1 **Title: Gut microbiome meta-analysis reveals dysbiosis is independent of**  
2 **body mass index in predicting risk of obesity-associated CRC**

3 **Authors:** K. Leigh Greathouse<sup>1,4</sup>, James Robert White<sup>2</sup>, R. Noah Padgett<sup>3</sup>,  
4 Brittany G Perrotta<sup>4</sup>, Gregory D Jenkins<sup>5</sup>, Nicholas Chia<sup>5,6</sup>, Jun Chen<sup>6</sup>.

5 **Author Affiliations:** 1 Nutrition Sciences Division, Robbins College of Health and  
6 Human Science, Baylor University, Waco, TX; 2 Resphera Biosciences, Baltimore,  
7 MD, USA; 3 Department of Educational Psychology, Baylor University; 4  
8 Department of Biology, Baylor University; 5 Department of Surgery and  
9 Department of Physiology and Biomedical Engineering, Mayo Clinic; 6 Division of  
10 Biomedical Statistics and Informatics, Department of Health Sciences Research,  
11 Mayo Clinic.

12 **Abstract:**

13 Obesity is a risk factor for colorectal cancer (CRC), accounting for more than 14%  
14 of CRC incidence. Microbial dysbiosis and chronic inflammation are common  
15 characteristics in both obesity and CRC. Human and murine studies, together,  
16 demonstrate the significant impact of the microbiome on governing energy  
17 metabolism and CRC development; yet, little is understood about the contribution  
18 of the microbiome to development of obesity-associated CRC as compared to non-  
19 obese individuals. In this study, we conducted a meta-analysis using five publicly  
20 available stool and tissue-based 16S rRNA and whole genome sequencing (WGS)  
21 data sets of CRC microbiome studies. High-resolution analysis was employed for  
22 16S rRNA data using Resphera Insight, which allowed us to achieve species-level  
23 information to compare with WGS. Characterization of the confounders between

1 studies, 16S rRNA variable region, and sequencing method, did not reveal any  
2 significant effect on alpha diversity in CRC prediction. Both 16S rRNA and WGS  
3 were equally variable in their ability to predict CRC. Results from community  
4 structure and composition analysis confirmed lower diversity in obese individuals  
5 without CRC; however, no universal differences were found in diversity between  
6 obese and non-obese individuals with CRC. When examining taxonomic  
7 differences, the probability of being classified as CRC did not change significantly  
8 in obese individuals for all taxa tested. However, random forest classification was  
9 able to distinguish CRC and non-CRC stool when body mass index was added to  
10 the model. Overall, microbial dysbiosis was not a significant factor in explaining the  
11 higher risk of colon cancer among individuals with obesity.

12 **Introduction.** The percentage of individuals who are overweight or obese in the  
13 U.S. has reached epidemic proportions, with the prevalence of individuals who are  
14 overweight (32.7%) or obese (34.3%), as defined by body mass index (BMI), in the  
15 United States representing about two thirds of adult Americans. The health risks  
16 associated with overweight and obesity include diabetes, cardiovascular disease,  
17 and cancer. The National Cancer Institute estimates that 3.2% of all new cancers  
18 are due to obesity and that 14% of deaths from cancer in men and 20% in women  
19 are attributed to obesity (1, 2). Colorectal cancer (CRC) accounts for  
20 approximately 142,000 new cancer cases and 50,000 cancer deaths annually,  
21 making it the second most lethal cancer in the U.S. (SEER). Several  
22 epidemiological studies demonstrate that adult obesity increases the risk of colon  
23 cancer 1.2 to 2-fold, with obesity accounting for 14-35% of total colon cancer

1 incidence (1, 3-5). Alarming, incidence and mortality from CRC is on the rise  
2 among those under the age of 55 (SEER), possibly due to the significant increase  
3 in obesity in women (6). For these reasons, it is imperative to identify new methods  
4 to reduce the burden of obesity on the risk and mortality from colon cancer. Three  
5 areas of inquiry are important for understanding the etiology of CRC: obesity,  
6 inflammation, the microbiome.

7         Several studies indicate that specific microbial taxa are playing a role in the  
8 etiology of colon cancer. However, whether the microbiome is also contributing to  
9 development of obesity-associated colon cancer in *humans* is completely  
10 unknown. One method that has shown promise for identifying early stage colon  
11 cancer is through analyzing the microbiome of the gastrointestinal tract (GI). The  
12 structure and function of the bacterial community that makes up the human colon,  
13 in part, determines the function and health of the colonic epithelium, as well as, the  
14 immune system responses. Several studies have found colon cancer-associated  
15 microbiota in pre-cancerous colon tissue (adenomas). Further, the microbiome has  
16 been used to distinguish pre-cancerous adenomas from CRC, though with variable  
17 rates of accuracy (7-9). Several bacteria have been identified as promoters in  
18 colon cancer development, including enterotoxigenic *Bacteroides fragilis* and  
19 *Fusobacterium nucleatum* (10-14). Both have also been isolated from patients with  
20 familial adenomatous polyposis (FAP) or inflammatory bowel disease, which are  
21 risk factors for colon cancer (11, 15). Colorectal adenocarcinomas associated with  
22 high abundance of fecal *F. nucleatum*, specifically, were found to have the highest  
23 number of somatic mutations, suggesting that these mutations create a pathogen-

1 friendly environment (16, 17). In animal models of colon cancer, inoculation of  
2 germ-free animals with stool from tumor-bearing animals were found to have more  
3 tumors than mice inoculated with stool from tumor-free animals (18). More  
4 recently, colonic biofilms from individuals with familial adenomatous polyposis  
5 were found to be dominated by *E. coli* and *B. fragilis* biofilms and enriched with  
6 genotoxic colibactin and *B. fragilis* toxin (ETBF) genes (11).

7 Multiple lines of evidence demonstrate that both diet and obesity can  
8 significantly alter the microbiome (19-25). One of the first seminal studies illustrating  
9 the impact of the microbiome on obesity, transferred the fecal microbiota from  
10 monozygotic twins who were obese or lean to germ-free mice. From this study, they  
11 were able to recapitulate the obesity phenotype in humanized mice (26). When  
12 examining microbiota and subsequent changes in metabolism after fecal transfer from  
13 obese mice to germ-free mice, it was found that this obesogenic microbial community  
14 had an increased production of SCFAs, which was later shown to abrogate lipid  
15 storage (23, 26). Multiple follow-up studies in obese and lean individuals have linked  
16 the specific shift in the microbiota to the ratio of *Bacteroides:Firmicutes* (25, 27, 28).  
17 However, a recent meta-analysis of these studies indicate that this ratio is not  
18 sufficient to differentiate obese from lean individuals in separate studies. Thus, more  
19 research is necessary to identify the microbiome- host relationship in individuals with  
20 obesity (29, 30).

21 Chronic inflammation is a hallmark of both obesity and CRC etiology. Obesity  
22 is characterized by pro-inflammatory adipose tissue macrophages that secrete high  
23 levels of IL-17, a cytokine which is also induced by ETBF in murine models of colon

1 cancer (10, 31, 32). Given the reciprocal relationship between the microbiome and  
2 the immune system, it is logical to hypothesize that obesity-associated microbial  
3 dysbiosis, combined with a state of chronic inflammation, contributes to the increased  
4 risk of colon cancer among obese individuals. In support of this hypothesis, animal  
5 models of colon cancer (Apc<sup>1638N</sup>), have demonstrated that a high fat diet or  
6 genetically (ob/ob) induced obesity can significantly alter the microbiome leading to a  
7 loss of *Parabacteroides distasonis* and an increase in pro- inflammatory factors (22).  
8 In a separate model of colon cancer (K-ras<sup>G12Dint</sup>), fecal transfer from high-fat fed mice  
9 with intestinal tumors to genetically susceptible mice on a standard diet replicated the  
10 disease phenotype (33). Thus, it appears that a high fat diet may be sufficient to  
11 change the microbiome into a tumor-promoting community independent of obesity  
12 and glucose response. Intriguingly, *Akkermansia muciniphila*, which is reduced in  
13 obese individuals and is associated with epithelial barrier function, is paradoxically  
14 higher in CRC (34, 35). This data, together with evidence that *A. muciniphila* can  
15 modulate glucose metabolism and inflammation in the colon, suggests it may play a  
16 role in obesity-associated CRC (35, 36). As these data demonstrate, there are a  
17 variety of dysbiotic states that exist in obese individuals, which could further enhance  
18 the inflammatory state of the GI tract leading to an increased risk of CRC. No human  
19 studies to date have addressed the obesity-associated differences in the microbiome  
20 and its relationship to CRC however.

21 In this study, we utilized multiple publicly available data sets in which either  
22 stool or tissue microbiome sequencing was conducted, and from which body mass  
23 index (BMI) was also available. Using the bioinformatics tools QIIME (16S rRNA) and

1 Pathoscope (WGS), we processed the 16S rRNA and WGS reads, and derived a  
2 taxonomic profile from each of the samples. Furthermore, we inferred taxonomic  
3 function to assess potential metabolic differences in obese individuals with CRC. We  
4 used these taxa and the metabolic pathway information to determine if a taxonomic  
5 signature or if specific taxa were associated with both obesity and CRC. From this  
6 analysis, we observed that the dysbiosis associated with obesity was independent  
7 from the dysbiosis associated with CRC.

## 8 **METHODS**

### 9 *Sample Population*

10 For this study we identify studies relevant to assess the relationship between  
11 obesity and CRC using the microbiome as the independent variable using the following  
12 search terms in PubMed (((("humans"[MeSH Terms] AND ("2006"[PDAT] :  
13 "2016"[PDAT])) NOT Review[Publication Type]) AND (obesity[Text Word] OR bmi[Text  
14 Word] OR body mass index[Text Word] OR BMI[Text Word] OR obesity[Text Word]))  
15 AND (bacterial[All Fields] AND ("microbiota"[MeSH Terms] OR "microbiota"[All Fields]  
16 OR "microbiome"[All Fields]))) AND (("colonic neoplasms"[MeSH Terms] OR  
17 ("colonic"[All Fields] AND "neoplasms"[All Fields]) OR "colonic neoplasms"[All Fields]  
18 OR ("colon"[All Fields] AND "cancer"[All Fields]) OR "colon cancer"[All Fields]) OR  
19 ("colorectal neoplasms"[MeSH Terms] OR ("colorectal"[All Fields] AND "neoplasms"[All  
20 Fields]) OR "colorectal neoplasms"[All Fields] OR ("colorectal"[All Fields] AND  
21 "cancer"[All Fields]) OR "colorectal cancer"[All Fields]) OR CRC[All Fields])  
22 . From our PubMed search we identified 5 (out of 124) studies that met all of our  
23 criteria: primary research in a human population, colon or colorectal cancer AND

1 normal stool or tissue collected, raw sequences available from either 16S rRNA or  
2 WGS sequencing, body mass index available as a variable in the metadata including  
3 age and sex. Together, 5 studies were identified that assessed both BMI and the  
4 microbiome in stool or tissue from individuals with adenomas, carcinomas or  
5 individuals without disease (Table 1). Three of these studies conducted 16S rRNA  
6 sequencing on stool or tissue, and 3 conducted WGS on stool or tissue, with one  
7 utilizing RNA sequencing. One study conducted both 16S rRNA and WGS on tissue  
8 and stool.

### 9 *Processing of Microbial Reads and Calculation of Diversity*

10 All sequence data were downloaded from the NCBI Sequence Read Archive. In order to  
11 eliminate differences between studies, we processed the reads using the same  
12 methods, either QIIME plus the algorithm Resphera Insight for 16S rRNA sequencing or  
13 Pathoscope (v1.0) for processing WGS or RNA-seq reads. For the studies sequencing  
14 the 16S rRNA gene, the V4 region was used for all stool samples, as well as, tissue,  
15 with the exception of the subsample of tissue from another study used as part of the  
16 Zeller et al. 2014 data set. Details regarding sequencing methods and variable regions  
17 amplified for each data set are listed in Table 1.

18 Raw paired-end reads reflecting 16S rRNA fragments were merged into consensus  
19 sequences using FLASH (min overlap: 20 bp overlap; 5% max mismatch density), and  
20 trimmed for quality (target error rate < 1%) using Trimmomatic and QIIME. PhiX control  
21 sequences were identified using BLASTN and filtered. Resulting sequences were  
22 evaluated for chimeras with UCLUST (*de novo* mode) and screened for human DNA  
23 using Bowtie2 against NCBI *Homo sapiens* Annotation Release 106. Reads assigned to

1 chloroplast or mitochondrial contaminants by the RDP classifier with a minimum  
2 confidence of 50% were also removed. High-quality 16S rRNA sequences were  
3 assigned to a high-resolution taxonomic lineage using Resphera Insight (37-39)  
4 Raw paired-end shotgun metagenomics sequence datasets were also trimmed for  
5 quality using Trimmomatic (min final length 75bp) and screened for human genomic  
6 DNA using Bowtie2 (--sensitive setting against GRCh38 reference with alternate  
7 chromosomes). High-quality passing sequences were submitted to Pathoscope v1.0  
8 for species level characterization (40, 41).

9

#### 10 *Prediction of Metagenomic Pathways*

11 We utilized two methods in order to derive abundance of metabolic pathways  
12 from the 16S rRNA or WGS sequences. For the 16S rRNA reads, after obtaining the  
13 OTU tables, we utilized the PICRUSt algorithm. This method obtains the  
14 representative genomes according the nearest neighbor match, and then normalizes  
15 the genome abundance using the 16S rRNA copy number for that genome. Once the  
16 metagenomics content is binned, it is expressed in terms of KEGG representative  
17 ortholog (KO) counts. For the WGS reads, we utilized the HUMAnN algorithm. This  
18 method takes as input short DNA or RNA reads and uses BLAST to identify  
19 orthologous gene families, which are used to identify metabolic pathways. Once  
20 identified, the pathways are then normalized by presence/absence of the taxa, and  
21 additionally by relative abundance of the taxa present in the sample. These data were  
22 used for downstream statistical analysis to compare obese and normal stool samples  
23 from individuals with or without CRC.



## 1 *Statistical Analyses*

2                   Prior to analysis we rarefied the data to the sample with the lowest  
3 number of reads. In order to test the association between BMI and the microbiome, we  
4 grouped our statistical analyses into four subgroups: A) normal stool samples (healthy  
5 controls), B) CRC stool or CRC tissue, and C) pooled samples (healthy controls and  
6 CRC), all of which were adjusted for age and sex. Group C was further adjusted for  
7 disease status.

8                   For alpha diversity measurements, we used both the observed number of OTUs  
9 and the Shannon Index. To determine associations with BMI, we treated it as a  
10 continuous variable (as a covariate) in the main analysis. For additional analyses, we  
11 also dichotomized the subjects into non-obese (BMI < 30) and obese (BMI  $\geq$  30)  
12 according the WHO guidelines.

13                   For beta diversity measurements, we utilized four distance measurements  
14 unweighted UniFrac, weighted UniFrac, generalized UniFrac and Bray-Curtis for 16S  
15 datasets. For WGS/RNA-seq data, where we do not have the phylogenetic tree, we  
16 instead used two non-tree-based distance measurements Jensen-Shannon and Bray-  
17 Curtis (42). Different distance measurements represent different views of the microbial  
18 community and multiple distance measurements are used to have a more  
19 comprehensive view. In order to determine the difference in community membership  
20 between BMI categories, we used the PERMANOVA test on single distance  
21 measures, with the omnibus test on the combination of all distance metrics  
22 (PermanovaG, 'GUniFrac' R package) (43).

1 In order to compare taxonomic abundance between groups, we used as input OTU  
2 counts. Negative binomial regression was used with BMI as a continuous variable for  
3 analysis of the microbiome while controlling for age and sex. Using multilevel  
4 modeling, the effects of confounders in study designs are examined. In this multilevel  
5 model, the study is defined as level 2 and the individual observations are level 1. At  
6 level 1, the outcome is CRC status (1=has CRC, 0=does not) and is predicted by an  
7 intercept, alpha diversity and BMI. At level 2, the level 1 regression coefficients (i.e.  
8  $\beta_{0j}$ ,  $\beta_{1j}$ , and  $\beta_{2j}$  for the intercept, alpha diversity and BMI regression coefficient,  
9 respectively) are modeled by the study characteristics. In this model, the level 1  
10 regression coefficients vary among studies, which means, for example, that the effect  
11 of alpha diversity to predict CRC status varies by study and study characteristics. For  
12 precisely, we are estimating the following model:

$$13 \quad \text{logit}(\mu_{ij}) = \beta_{0j} + \beta_{1j}(\text{Alpha Diversity}) + \beta_{2j}(\text{BMI}) + \epsilon_{ij}$$

14 Where the regression coefficients are modeled by study characteristics. For  
15 example,  $\beta_{0j} = \gamma_{00} + \gamma_{01}(\text{Sequencing Method}) + \gamma_{02}(\text{Variable Region}) + u_{0j}$ ; which  
16 defines how the model parameter vary by study characteristics. In this model, the  $\gamma$ 's  
17 represent the level two model parameters and  $u$  is the study specific error term.  
18 Estimation of this model is employed using the lme4 (linear mixed effects) package in  
19 R (44). Due to the few number of studies included in this meta-analysis, the estimation  
20 of the variance of the level 1 parameters is uncertain and should be interpreted with  
21 caution.

22 In order to compare taxonomic abundance between groups, we used as input  
23 OTU counts. Negative binomial regression was used with BMI as a continuous

1 variable (obese vs. non-obese) for analysis of the microbiome while controlling for age  
2 and sex. Multiple testing procedure was conducted on these values using BH-based  
3 false discovery rate control. The criterion to declare significance was q-value  $<0.2$  .  
4 Furthermore, the abundance of *Bifidobacterium catenulatum* was examined among  
5 groups of obese or non-obese individuals with and without CRC. The standardized  
6 mean differences among studies was calculated using Hedge's g, a bias corrected  
7 estimate of standardized mean differences. Estimation was employed using the meta  
8 package in R (45).

9 Mediation analyses were also conducted. The goal of these analyses is to  
10 uncover if the relationship between BMI and CRC status is mediated by bacteria  
11 present. First, bacteria were dummy coded for presence or not for everyone. By  
12 dummy coded solely for whether an individual has a given bacteria or not, these  
13 results are not meant to show mediation among varying levels of each bacterium.  
14 Second, the relationship between BMI and CRC status was estimated by using a  
15 simple logistic regression model. Third, the classic mediation model was estimated by  
16 using the lavaan package in R (46). This model is estimated for the presence of each  
17 bacterium. Lastly, the change in the odd ratio is calculated between models. The  
18 change in the OR is an estimate of the mediation effect that a bacterium has on the  
19 relationship between BMI and CRC status.

20 Further exploration of whether taxonomic abundance among obese or non-  
21 obese individuals is indicative of CRC utilized random forest analyses. Random forest  
22 analysis is a machine learning/predictive modeling algorithm designed to estimate an  
23 ensemble of decision trees that are combined to give an estimate of an output. In this

1 study, we employed random forest analyses as a classification of obesity (obese vs.  
2 non-obese) conditional on the status of CRC. Four random forests were grown for  
3 each study dataset when possible; the forests were grown using the relative  
4 abundance of taxa with or without age and sex included at the OTU and genus level  
5 for two subsets of data that were conditioned on CRC status (CRC or adenoma). The  
6 resulting models aimed to classify individuals as obese based on the microbiota  
7 composition, and these classification models were tested with 10-fold cross validation.  
8 The receiver-operating-curve (ROC) of these classifications was also inspected for  
9 how sensitive the models are to detect obese individuals and how specific these  
10 models are to select only individuals that are obese. A measure of model quality is the  
11 area under curve (AUC), or area under the ROC, where an AUC of one is perfect  
12 prediction and an AUC of .5 is pure chance or prediction. Another benefit of using  
13 random forest analyses is that an estimate of the predictive importance of each OTU  
14 or genera is estimated. This estimate of importance is found by the predictive quality of  
15 model conditional of the ensemble trees that do not contain that specific input variable  
16 (OTU or genera in this case). All processed data and code for this analysis has been  
17 deposited at: [https://github.com/GreathouseLab/CRC\\_BMI\\_meta\\_analysis](https://github.com/GreathouseLab/CRC_BMI_meta_analysis).

## 18 **Results**

19 **Database and study selection.** We performed a systematic review and meta-analysis  
20 guided search of the literature. Within this search we included studies that analyzed  
21 the microbiome of the stool or tissue from patients with colon cancer, and which also  
22 had clinical information from patients on BMI. From this initial search, we identified 24  
23 studies. After eliminating studies in which BMI information could not be obtained, 5

1 studies were included in the final analysis (Table 1). Given that our central hypothesis  
2 is predicated on a difference in microbial structure and composition between obese  
3 and non-obese individuals, we focused our initial analyses on the Baxter et al. study,  
4 which has adequate sample size to detect differences between these two groups (8).  
5 The remaining studies were used as comparators to support or negate any  
6 associations found between the microbiome and obesity.

7 **Characterization of cofounders between studies.** A major issue facing microbiome  
8 studies is the lack of standardized methods for collection, storage, nucleotide  
9 extraction, sequencing methodology and bioinformatic analysis. Thus, we began our  
10 analysis by characterizing the effect of 16S rRNA variable region and sequencing  
11 methods (16S rRNA or WGS) on observed OTUs and Shannon diversity on prediction  
12 of CRC. Unfortunately, we could not fully test the effect of nucleotide extraction as the  
13 Feng et al. study did not provide this information. We chose to focus on alpha  
14 diversity for this analysis given that it is a low-resolution measure, which allows for  
15 comparison across studies. Using multilevel modeling to predict CRC status we  
16 calculated the average log<sub>2</sub> OR (logit) for each study when these level 2 predictors  
17 (variable region and sequencing method) are included in the model. The results of this  
18 analysis demonstrated that alpha diversity and obesity vary by study but do not  
19 significantly change the probability of having CRC (Figure 1A-B; Figure S1).  
20 Interestingly, the Feng et al. data set display an unusual inverse relationship between  
21 CRC ad BMI that strongly impacts prediction of CRC, possibly due to geographic and  
22 dietary differences in this population. Since all but one of the studies used the V4 16S  
23 rRNA region, it was difficult to determine if this variable had a significant impact.

1 Between the studies that used different extraction techniques, Zeller (GNOME DNA  
2 Isolation Kit, MP Biomedical) vs Baxter and Zackular et al.(Power Soil, Mo Bio), we  
3 did not observe an effect of extraction technique on the relationship between alpha  
4 diversity and probability of CRC (Figure 1A-B). Further, the predictive ability of 16S  
5 rRNA data, alpha diversity, to classify CRC varies among studies but using WGS does  
6 not improve this predicative ability nor does variable region choice (Figure 1A-B).  
7 Overall, among the potential confounders we tested, we did not observe a significant  
8 effect on the ability of alpha diversity to classify CRC cases and controls when  
9 controlling for obesity.

10 **Alpha Diversity Analysis.** We next sought to validate previous studies showing  
11 differences in alpha diversity between obese and non-obese individuals without CRC.  
12 In order to analyze alpha diversity within each sample study population, we calculated  
13 both richness, observed OTUs, and Shannon diversity, which considers both  
14 evenness and richness. We conducted linear modeling analysis using BMI as a  
15 continuous measurement and calculated the observed OTUs and Shannon diversity  
16 controlling for age and sex. Confirming previous microbial studies of stool from healthy  
17 (non-CRC) individuals (30), we also found significantly lower Shannon diversity in  
18 individuals that are obese without cancer from two of the 16S rRNA data sets (Baxter  
19 and Zeller et al. (WGS)) and lower richness in the Zeller et al. (16S) data; unadjusted  
20 Mann-Whitney U tests did not show this same result comparing individuals with and  
21 without obesity (Fig. 2A; Supplemental Fig S2A and Table 2). Supporting previous  
22 meta-analyses, however, studies with N<100 subjects displayed similar trends but did  
23 not reach statistical significance. When we asked if this same trend of lower Shannon

1 diversity was present in obese individuals with CRC, we saw no association, with the  
2 exception of the Feng dataset, which demonstrated a significantly higher alpha  
3 diversity with higher BMI both as continuous and categorical models, but not in the  
4 unadjusted analysis (Fig. 2B; Supplemental Fig S2B and Table 2). These results may  
5 be due to geography and diet of Asian populations. We chose not to analyze the  
6 *Bacteroides/Firmicutes* ratio as this has not demonstrated to be a consistent  
7 measurement of predicting obesity in human studies (30). Together, these data  
8 indicate that while there is an association between community composition and obesity  
9 in those without CRC, this association is not present in those with both obesity and  
10 CRC.

11 **Beta Diversity Analysis.** We next asked whether we could detect microbial  
12 community differences in structure between obese and normal weight individuals with  
13 or without CRC. In order to conduct this analysis, we calculated the distance matrix for  
14 each study using UniFrac or Bray-Curtis (BC) for 16S rRNA datasets, and BC or  
15 Jaccard-Sorrensen (JS) distance for WGS datasets. Further, we calculated the  
16 omnibus p-value for comparison of all distance matrices (47). In all of the data sets  
17 analyzed, except Vogtmann et al. (WGS), Zeller et al. (WGS), and Zeller et al. (16S  
18 rRNA/tissue), we observed a significant difference (omnibus p-value <0.05) in  
19 community structure between obese and non-obese individuals without CRC (Table 3;  
20 see Fig. S3A in supplemental materials). This same analysis in individuals with CRC  
21 (obese v non-obese), however, yielded only one significant observation in the Feng et  
22 al. dataset (Table 3; Supplemental Fig. S3B), supporting the observations with

1 community composition. Thus, similar to community composition, community structure  
2 is associated with BMI in individuals without CRC but not in those with CRC.

3 **Taxonomic Diversity Analysis.** Again, we began our taxonomic analysis comparing  
4 individuals with and without obesity among individuals without CRC as a means of  
5 validating previous studies, using as our reference the largest study dataset, Baxter et  
6 al. (8). From this analysis, controlling for age and sex, a significantly lower relative  
7 abundance of several *Ruminococcus spp.* was identified in the two of the datasets  
8 (Zackular et al., Zeller et al. (16S rRNA stool), Zeller et al. (WGS), as well as,  
9 *Coprococcus spp.* (Baxter et al., Zackular et al., Zeller et al. (16S rRNA stool)),  
10 *Bacteroides spp.* (Baxter et al., Zackular et al., Feng et al., Vogtmann et al., Zeller et  
11 al. (WGS)), *Bifidobacterium spp.* (Zeller et al. (WGS)) and *Akkermansia muciniphila*  
12 (Zackular et al., Zeller et al. (WGS)) (Supplemental Fig. S4 and Supplemental Table  
13 1). When combining all differentially significant species, those from genus *Bacteroides*  
14 and *Bifidobacteria* appeared most often to differentiate individuals with and without  
15 obesity (Supplemental Table 1). While no one genera or species was found to be  
16 differentially abundant (higher or lower) between all 5 datasets comparing individuals  
17 with or without obesity among individuals without CRC, the genus *Bacteroides*  
18 contained the greatest number of differentially abundant species in individuals with  
19 obesity in all but one dataset (Supplemental Table 1).

20

### 21 **Mediation effect of differentially abundant taxa on obesity-associated CRC**

22 **classification.** In order to determine if any taxa were affecting (mediating) the  
23 relationship between BMI and CRC probability, we took two approaches. The first



1 approach was a classical mediation test, in which we constructed three tests. First, we  
2 estimated the odds-ratio (OR) of individuals with higher BMI being more likely to be  
3 classified as having CRC. Second, we estimated the same relationship between BMI  
4 and CRC status while controlling for the mediating effect of differentially abundant  
5 bacteria. Meaning, if the bacterium mediates the relationship between BMI and CRC  
6 probability then the OR for BMI will decrease. Third, we calculated how much *change*  
7 in the OR occurred from the first to second model. Thus, from this change in ORs, we  
8 estimated how much of an effect including each taxa had on increasing or decreasing  
9 the probability of being classified as CRC for each one unit increase in BMI. From this  
10 analysis, we identified several taxa that increased or decreased the probability of CRC  
11 (Supplemental Tables 2-3). Species from the *Bacteriodes*, *Ruminococcus* and  
12 *Prevotella* genera, as well as, *Bifidobacterium catenulatum* decreased the probability  
13 of CRC with increasing BMI, except for two species of *Prevotella* which increased  
14 CRC probability. The mediation effect of these taxa, however, was relatively weak;  
15 less than 1% change in OR (change in probability of CRC, OR range =  $-9e-05$  –  $-0.01$ )  
16 (Supplemental Table 2), with the majority showing a negative effect and only 8/34  
17 showing a positive effect; none showed a significant mediation effect (Supplemental  
18 Table 2).

19 In our second approach, we derived an overall mediation effect using the FDR  
20 adjusted p-values (q-values) from our analysis of the Pooled BMI data (association  
21 between BMI and microbiome using all samples only, adjusting for disease status, sex  
22 and age) and Pooled DS data (association of disease status with microbiome using  
23 CRC and normal samples, adjusting for BMI, sex and age). These overall Q-values

1 were approximately based on  $1 - (1 - q_1)(1 - q_2)$ , where  $q_1$  and  $q_2$  are  $q$  values for the  
2 BMI and DS associations on the pooled data set ( $q$  value can be interpreted as the  
3 probability of being false positive,  $1 - (1 - q_1)(1 - q_2)$  is the probability of being false  
4 positive in either of the associations, assuming independence between the two tests).  
5 The  $q$ -values were calculated for each data set, and  $q$ -values for taxa  $<20\%$  were  
6 considered to have a significant mediating effect. Using this approach, we looked for  
7 taxa that had a significant mediating effect between studies and identified two,  
8 *Phascolarctobacterium succinatutens* and *Streptococcus salivarius*; however, they  
9 were only shared between 2/6 studies each (Supplemental Table 4). Overall, these  
10 results indicate the majority of bacteria associated with CRC and BMI decrease the  
11 odds of CRC in individuals with obesity, but only weakly.  
12 In addition, to determine if previously identified CRC-associated taxa, *F. nucleatum*, *F.*  
13 *prausnitzii*, *B. fragilis*, or *A. muciniphila*, were altered in individuals with obesity in their  
14 ability to differentiate CRC from non-CRC, we calculated the log<sub>2</sub> odds ratios for each  
15 species. (Supplementary Fig. S5). Overall, among individuals with obesity, *F.*  
16 *nucleatum* consistently showed stronger prediction (log<sub>2</sub> OR) of CRC.  
17 **Ability of the microbiome to classify obesity-associated CRC.** Given that previous  
18 studies have demonstrated the predicative capability of the microbiome in generating  
19 classifiers for CRC, we next asked whether a taxonomic consortium could accurately  
20 predict obesity-associated CRC. Using the machine learning method random forest,  
21 we calculated importance scores among obese individuals at the OTU or genus level  
22 using 10-fold cross-validation in individuals with adenomas or CRC. These values  
23 were then used to calculate area under the receiver operator curve using age and sex

1 as co-variates or the microbiome alone. Among all obese individuals, the average of  
2 all AUC values predicting CRC cases at the OTU and genus level was 0.66 (0.47-  
3 0.84) and 0.68 (0.47-0.94), respectively (Fig. 3B). Similarly, among obese adenoma  
4 cases, average AUC values at the OTU and genus level were 0.61 (0.48-0.86) and  
5 0.60 (0.52-0.73), respectively (Fig. 3A); demonstrating high heterogeneity among  
6 studies in predicting CRC or adenomas in obese individuals. Lastly, we sought to  
7 validate CRC classifiers developed by Baxter et al. and Zeller et al. by agnostic  
8 application of our random forest classifier on each dataset using all genera or OTUs.  
9 While Zeller et al. used a more complex statistical approach to construct their  
10 classifier, we choose to apply the same method (48) to each study for the purposes of  
11 comparison, which was almost identical to Baxter et al. (excluding smoking and  
12 hemoglobin test results). Overall, the microbiome by itself or controlling for BMI, age  
13 and sex, had low and variable AUC values (OTU; AUC=0.53-0.79; Genus; AUC=0.59-  
14 0.81) in most studies. We were able, however, to validate the classifier from the  
15 Baxter et al. and Feng et al. studies; our AUC values were 0.79 (Baxter et al.) and  
16 0.81 as compared to Baxter et al. (AUC=0.84) and Feng et al. (AUC=0.96). Although  
17 we could not approach the classifier values from the Zeller et al. study (AUC=0.84;  
18 without FOBT), this was likely due to the difference in their approach in building the  
19 classifier. In general, these data indicate that the microbiome together with clinical  
20 data, and likely FOBT or similar tests, could have diagnostic utility.

21 **Analysis of Inferred Taxonomic Function.** Multiple studies have demonstrated that  
22 taxonomic abundance alone does not accurately reflect the metabolic function of the  
23 entire community. Thus, we interrogated the metabolic potential of the bacterial

1 community using the bioinformatics tool PICRUSt in order to obtain predicted  
2 functions. Among individuals without CRC, we identified biotin synthesis and biotin  
3 metabolism inversely correlated with BMI in the Vogtmannn (WGS) stool samples, and  
4 the urea cycle (M0029) inversely correlated with BMI in both Vogtmannn (WGS) and  
5 Feng (WGS) (Figure 4A-B). However, none of these predicted functions differentiated  
6 obese individuals among all studies. When we conducted this analysis in individuals  
7 with CRC, no shared correlations were identified when comparing obese and non-  
8 obese. Predicted functional analysis therefore, did not further distinguish obesity-  
9 associated CRC from those with CRC and normal BMI.

## 10 **Discussion.**

11 Evidence clearly demonstrates an intimate link between inflammation, obesity, and  
12 the microbiome (34, 36, 49-56). *In vivo*, multiple studies indicate an interaction or  
13 mediating effect of the microbiome in promoting colon tumorigenesis in the presence  
14 of a high-fat diet or genetic-induced obesity (21, 22, 57-59). In this study, using BMI as  
15 a measure of obesity, we were able to initiate the first analysis addressing this  
16 outstanding question in human subjects.

17 This is the most comprehensive high-resolution study of the microbiome in  
18 individuals with and without obesity among those with CRC, using multiple sequencing  
19 platforms and methods. In this meta-analysis, we describe both obesity- and CRC-  
20 associated results. First, we found both community structure and composition in stool  
21 and tissue samples from individuals with CRC are independent of BMI. Second, we  
22 identified a weak effect of the majority of species associated with both BMI and CRC  
23 on risk of CRC. Lastly, we show the microbiome, by itself or modeled with age and

1 sex, is insufficient to classify adenomas or CRC from obese controls. However, when  
2 controlling for clinical variables and BMI, we are able to achieve similar levels of CRC  
3 classification to other studies (48). Overall, by combining species-level resolution from  
4 16S rRNA and WGS data, we were able to define the microbial community structure  
5 and function at a high resolution, revealing overall a weak effect of the microbiome on  
6 mediating CRC risk among individuals with obesity as compared to those with normal  
7 BMI.

8 While this study did not identify any strong universal BMI-associated microbial  
9 biomarkers of CRC, many mechanisms are likely key in driving the increased risk of  
10 CRC in obese individuals that we could not account for in this study. These include  
11 tumor location (left vs right), mutation profile, differentiation, mismatch repair status,  
12 and diet; some of which have shown to differentiate individuals with obesity among  
13 those with CRC (60-63). A high fat diet may be more important than BMI or obesity in  
14 driving the deleterious changes in the microbiome in individuals with obesity. In  
15 support, feeding a high-fat diet to K-ras<sup>G12Dint</sup> mice is sufficient to drive tumorigenesis  
16 from 30% to 60% (33). Moreover, when feces from high fat fed mice (K-ras<sup>G12Dint</sup>) are  
17 transferred to healthy (K-ras<sup>G12Dint</sup>) mice, tumor burden is increased along with  
18 diminished immune cell recruitment (33). This was prevented, however, when  
19 supplemented with butyrate, which also increased *Bifidobacterium* abundance as  
20 compared to mice not supplemented with butyrate (33). We also found several species  
21 of *Bifidobacterium* lower in individuals with obesity among those with and without  
22 CRC. Interestingly, butyrate and butyrate producing bacteria were shown to be  
23 increased in African-American men after switching to a traditional high fiber, low-fat

1 rural African diet (64). Again, similar to the results of high-fat feeding promoting CRC,  
2 which was abrogated with butyrate treatment, the aforementioned study found that the  
3 high-fat Western diet of African-Americans was associated with higher secondary bile  
4 acids, known promoters of carcinogenesis. Together, these studies indicate that a high  
5 fat diet, specifically from saturated fats, may be interacting with the microbiome to  
6 create a pro-inflammatory environment conducive to colon carcinogenesis.

7 Other possible mechanisms explaining the increased risk of CRC in individuals with  
8 obesity include a lack of balance in key immune regulatory cells, specifically regulatory  
9 T cells (Tregs) and B lymphocytes. Demonstration that Tregs are important in  
10 promoting colon tumorigenesis, indicates that species that can control their activation  
11 may be important in controlling CRC development. Specifically, when *B.*

12 *pseudocatenulatum* (CECT 7765) was given orally to obese mice, it increased Tregs  
13 and reduced pro-inflammatory cytokines (IL-17A and TNF- $\alpha$ ), which further supports  
14 the hypothesis that certain species may protect against chronic inflammation and  
15 development of CRC (51). In reports measuring dietary inflammatory factors (empirical  
16 dietary inflammatory pattern), individuals with higher inflammatory scores had fewer  
17 tumor-associated adaptive anti-tumor immune cells suggesting immune evasion (65).  
18 Moreover, using this same approach, higher inflammatory scores were associated with  
19 higher tumor-associated *F. nucleatum* in CRC (66). Again, these findings support a  
20 distinct influence of diet on the microbiome in CRC development apart from obesity.

21 BMI is crude measure of obesity, and other more accurate measures (e.g. waist  
22 circumference, adipokines, etc.) are required to fully explore the relationship between  
23 obesity, inflammation, and the microbiome in development of CRC. An exemplar of

1 this relationship is demonstrated for lung cancer, wherein the use of BMI demonstrates  
2 a lower risk of lung cancer is associated with higher BMI but use of waist  
3 circumference or waist to hip ratio demonstrates and increased risk of lung cancer  
4 (67). Thus, this study sets the stage for future research to consider adding measures  
5 of adiposity beyond BMI when studying the etiology and risk of CRC, as well as, other  
6 cancers influenced by obesity.

7 This study has several strengths, as well as, limitations. One important strength,  
8 was the ability to use multiple peer-reviewed studies that had similar study designs  
9 and sequencing methods. As the Microbiome Quality Control Project demonstrated,  
10 multiple factors (e.g. DNA extraction method) can contribute to differential findings  
11 between studies, and thus our ability to control for these confounding factors reduced  
12 this bias (68-71). Also, the ability to confirm the presence of multiple taxa using  
13 separate sequencing methods, 16S rRNA and WGS methods, further strengthened  
14 the design of this analysis. The limitations of this study include small sample sizes in  
15 the majority of studies, use of only one anthropometric measurement of obesity and  
16 lack of other informative factors including dietary fat intake, previous weight loss prior  
17 to CRC diagnosis, microbial metabolites and biofilm presence. Sample size is a key  
18 limitation when looking at the relationship between obesity (BMI) and the microbiome  
19 as previously demonstrated (30). Only the Baxter (8) study was sufficiently powered to  
20 detect a significant difference in the microbial community between normal and obese  
21 individuals. While we were able to identify taxa that differentiated obese and normal  
22 individuals with CRC in this study specifically, these taxa were not consistent across  
23 all studies, indicating that other factors such as metabolites, biofilm or the immune

1 system are stronger contributors to this relationship. While we were able to derive  
2 inferred function from the microbial sequences, without more intensive direct  
3 measurement of the metabolites (i.e. mass spectrometry), we cannot fully assess  
4 these differences. Additionally, studies have illustrated this lack of relationship  
5 between specific taxa and CRC, and instead identified a stronger association with the  
6 presence of biofilm formation. Lastly, animal studies demonstrating that CRC  
7 promotion by a high fat diet was independent of obesity supports our findings and  
8 suggests that dietary fat has a greater impact than obesity on the microbiome and its  
9 tumor-promoting capacity in CRC etiology. This will therefore be important to consider  
10 in the obesity-CRC relationship in future research.

11 Overall, our validation of microbiome-based classifiers indicates this approach, in  
12 combination with FOBT or FIT tests, is well supported for continued development.  
13 More important, these data along with other studies indicate that diet, rather than  
14 obesity, is creating a pro-inflammatory microbial community increasing CRC risk.  
15 Hence, characterizing the role of the diet in addition to the microbiome in CRC etiology  
16 is necessary, which will require more detailed molecular analyses and well-designed  
17 longitudinal human studies to identify early stage dietary and microbial biomarkers  
18 prior to disease.



## 1 **Funding Sources**

2 This work was supported by the Baylor University Summer Sabbatical Grant (PI –  
3 summer salary support). Nick Chia was supported by the NCI award R01CA179243.

## 4 **Competing interests**

5 James White is a significant shareholder in the company Resphera Insight Inc. All other  
6 authors declare that they have no competing interests

## 7 **Author contributions**

8 KLG conceived of the study, analysis plan, analyzed data, interpreted results and  
9 participated in writing and review; JW downloaded and processed all sequencing data;  
10 JC, GDJ and NP conducted statistical analyses; BGP processed data; JW, KLG, JC,  
11 GDJ, NP, BGP, and NC provided technical and data interpretation assistance and  
12 manuscript review. All authors read and approved the final manuscript.

## 13 **Acknowledgements**

14 We would like to thank the participants in each of the studies for their time dedication to  
15 supporting colon cancer research. Also, we thank all of the authors from each study for  
16 making their data publicly available for analysis, and to allow for transparency and  
17 reproducibly. Our thanks to the members of the Baylor Writing Group, Joe Taube, Karen  
18 Melton, Elise King, Elyssia Gallagher, for their feedback and editing.

19

## 20 **References**

- 21 1. **Arnold M, Pandeya N, Byrnes G, Renehan PAG, Stevens GA, Ezzati PM,**  
22 **Ferlay J, Miranda JJ, Romieu I, Dikshit R, Forman D, Soerjomataram I.** 2015.  
23 Global burden of cancer attributable to high body-mass index in 2012: a  
24 population-based study. *Lancet Oncol* **16**:36-46.  
25 2. **Whiteman DC, Wilson LF.** 2016. The fractions of cancer attributable to  
26 modifiable factors: A global review. *Cancer Epidemiol* **44**:203-221.

- 1 3. **Giovannucci E, Ascherio A, Rimm EB, Colditz GA, Stampfer MJ, Willett WC.**  
2 1995. Physical activity, obesity, and risk for colon cancer and adenoma in men.  
3 *Ann Intern Med* **122**:327-334.
- 4 4. **Engeland A, Tretli S, Austad G, Borge T.** 2005. Height and body mass index  
5 in relation to colorectal and gallbladder cancer in two million Norwegian men and  
6 women. *Cancer Causes Control* **16**:987-996.
- 7 5. **Calle EE, Kaaks R.** 2004. Overweight, obesity and cancer: epidemiological  
8 evidence and proposed mechanisms. *Nat Rev Cancer* **4**:579-591.
- 9 6. **Flegal KM, Kruszon-Moran D, Carroll MD, Fryar CD, Ogden CL.** 2016. Trends  
10 in Obesity Among Adults in the United States, 2005 to 2014. *JAMA* **315**:2284-  
11 2291.
- 12 7. **Feng Q, Liang S, Jia H, Stadlmayr A, Tang L, Lan Z, Zhang D, Xia H, Xu X,  
13 Jie Z, Su L, Li X, Li X, Li J, Xiao L, Huber-Schonauer U, Niederseer D, Xu X,  
14 Al-Aama JY, Yang H, Wang J, Kristiansen K, Arumugam M, Tilg H, Datz C,  
15 Wang J.** 2015. Gut microbiome development along the colorectal adenoma-  
16 carcinoma sequence. *Nat Commun* **6**:6528.
- 17 8. **Baxter NT, Ruffin MTt, Rogers MA, Schloss PD.** 2016. Microbiota-based  
18 model improves the sensitivity of fecal immunochemical test for detecting colonic  
19 lesions. *Genome Med* **8**:37.
- 20 9. **Nakatsu G, Li X, Zhou H, Sheng J, Wong SH, Wu WK, Ng SC, Tsoi H, Dong  
21 Y, Zhang N, He Y, Kang Q, Cao L, Wang K, Zhang J, Liang Q, Yu J, Sung JJ.**  
22 2015. Gut mucosal microbiome across stages of colorectal carcinogenesis. *Nat*  
23 *Commun* **6**:8727.
- 24 10. **Chung L, Thiele Orberg E, Geis AL, Chan JL, Fu K, DeStefano Shields CE,  
25 Dejea CM, Fathi P, Chen J, Finard BB, Tam AJ, McAllister F, Fan H, Wu X,  
26 Ganguly S, Lebid A, Metz P, Van Meerbeke SW, Huso DL, Wick EC, Pardoll  
27 DM, Wan F, Wu S, Sears CL, Housseau F.** 2018. *Bacteroides fragilis* Toxin  
28 Coordinates a Pro-carcinogenic Inflammatory Cascade via Targeting of Colonic  
29 Epithelial Cells. *Cell Host Microbe* **23**:203-214 e205.
- 30 11. **Dejea CM, Fathi P, Craig JM, Boleij A, Taddese R, Geis AL, Wu X, DeStefano  
31 Shields CE, Hechenbleikner EM, Huso DL, Anders RA, Giardiello FM, Wick  
32 EC, Wang H, Wu S, Pardoll DM, Housseau F, Sears CL.** 2018. Patients with  
33 familial adenomatous polyposis harbor colonic biofilms containing tumorigenic  
34 bacteria. *Science* **359**:592-597.
- 35 12. **Purcell RV, Pearson J, Aitchison A, Dixon L, Frizelle FA, Keenan JI.** 2017.  
36 Colonization with enterotoxigenic *Bacteroides fragilis* is associated with early-  
37 stage colorectal neoplasia. *PLoS One* **12**:e0171602.
- 38 13. **Bullman S, Pedomallu CS, Sicinska E, Clancy TE, Zhang X, Cai D, Neuberg  
39 D, Huang K, Guevara F, Nelson T, Chipashvili O, Hagan T, Walker M,  
40 Ramachandran A, Diosdado B, Serna G, Mulet N, Landolfi S, Ramon YCS,  
41 Fasani R, Aguirre AJ, Ng K, Elez E, Ogino S, Taberbero J, Fuchs CS, Hahn  
42 WC, Nuciforo P, Meyerson M.** 2017. Analysis of *Fusobacterium* persistence  
43 and antibiotic response in colorectal cancer. *Science* **358**:1443-1448.
- 44 14. **Yang Y, Weng W, Peng J, Hong L, Yang L, Toiyama Y, Gao R, Liu M, Yin M,  
45 Pan C, Li H, Guo B, Zhu Q, Wei Q, Moyer MP, Wang P, Cai S, Goel A, Qin H,  
46 Ma Y.** 2017. *Fusobacterium nucleatum* Increases Proliferation of Colorectal

- 1 Cancer Cells and Tumor Development in Mice by Activating Toll-Like Receptor 4  
2 Signaling to Nuclear Factor-kappaB, and Up-regulating Expression of MicroRNA-  
3 21. *Gastroenterology* **152**:851-866 e824.
- 4 15. **Strauss J, Kaplan GG, Beck PL, Rioux K, Panaccione R, Devinney R, Lynch**  
5 **T, Allen-Vercoe E.** 2011. Invasive potential of gut mucosa-derived  
6 *Fusobacterium nucleatum* positively correlates with IBD status of the host.  
7 *Inflamm Bowel Dis* **17**:1971-1978.
- 8 16. **Kostic AD, Chun E, Robertson L, Glickman JN, Gallini CA, Michaud M,**  
9 **Clancy TE, Chung DC, Lochhead P, Hold GL, El-Omar EM, Brenner D,**  
10 **Fuchs CS, Meyerson M, Garrett WS.** 2013. *Fusobacterium nucleatum*  
11 potentiates intestinal tumorigenesis and modulates the tumor-immune  
12 microenvironment. *Cell Host Microbe* **14**:207-215.
- 13 17. **Tahara T, Yamamoto E, Suzuki H, Maruyama R, Chung W, Garriga J, Jelinek**  
14 **J, Yamano HO, Sugai T, An B, Shureiqi I, Toyota M, Kondo Y, Estecio MR,**  
15 **Issa JP.** 2014. *Fusobacterium* in colonic flora and molecular features of  
16 colorectal carcinoma. *Cancer Res* **74**:1311-1318.
- 17 18. **Zackular JP, Baxter NT, Iverson KD, Sadler WD, Petrosino JF, Chen GY,**  
18 **Schloss PD.** 2013. The gut microbiome modulates colon tumorigenesis. *MBio*  
19 **4**:e00692-00613.
- 20 19. **Everard A, Lazarevic V, Gaia N, Johansson M, Stahlman M, Backhed F,**  
21 **Delzenne NM, Schrenzel J, Francois P, Cani PD.** 2014. Microbiome of  
22 prebiotic-treated mice reveals novel targets involved in host response during  
23 obesity. *ISME J* **8**:2116-2130.
- 24 20. **Ley RE, Turnbaugh PJ, Klein S, Gordon JI.** 2006. Microbial ecology: human  
25 gut microbes associated with obesity. *Nature* **444**:1022-1023.
- 26 21. **Pfalzer AC, Kamanu FK, Parnell LD, Tai AK, Liu Z, Mason JB, Crott JW.**  
27 2016. Interactions between the colonic transcriptome, metabolome, and  
28 microbiome in mouse models of obesity-induced intestinal cancer. *Physiol*  
29 *Genomics* **48**:545-553.
- 30 22. **Pfalzer AC, Nesbeth PD, Parnell LD, Iyer LK, Liu Z, Kane AV, Chen CY, Tai**  
31 **AK, Bowman TA, Obin MS, Mason JB, Greenberg AS, Choi SW, Selhub J,**  
32 **Paul L, Crott JW.** 2015. Diet- and Genetically-Induced Obesity Differentially  
33 Affect the Fecal Microbiome and Metabolome in *Apc1638N* Mice. *PLoS One*  
34 **10**:e0135758.
- 35 23. **Turnbaugh PJ, Backhed F, Fulton L, Gordon JI.** 2008. Diet-induced obesity is  
36 linked to marked but reversible alterations in the mouse distal gut microbiome.  
37 *Cell Host Microbe* **3**:213-223.
- 38 24. **Turnbaugh PJ, Hamady M, Yatsunenko T, Cantarel BL, Duncan A, Ley RE,**  
39 **Sogin ML, Jones WJ, Roe BA, Affourtit JP, Egholm M, Henrissat B, Heath**  
40 **AC, Knight R, Gordon JI.** 2009. A core gut microbiome in obese and lean twins.  
41 *Nature* **457**:480-484.
- 42 25. **Turnbaugh PJ, Ley RE, Mahowald MA, Magrini V, Mardis ER, Gordon JI.**  
43 2006. An obesity-associated gut microbiome with increased capacity for energy  
44 harvest. *Nature* **444**:1027-1031.
- 45 26. **Ridaura VK, Faith JJ, Rey FE, Cheng J, Duncan AE, Kau AL, Griffin NW,**  
46 **Lombard V, Henrissat B, Bain JR, Muehlbauer MJ, Ilkayeva O, Semenkovich**

- 1 **CF, Funai K, Hayashi DK, Lyle BJ, Martini MC, Ursell LK, Clemente JC, Van**  
2 **Treuren W, Walters WA, Knight R, Newgard CB, Heath AC, Gordon JI.** 2013.  
3 Gut microbiota from twins discordant for obesity modulate metabolism in mice.  
4 *Science* **341**:1241214.
- 5 27. **Bervoets L, Van Hoorenbeeck K, Kortleven I, Van Noten C, Hens N, Vael C,**  
6 **Goossens H, Desager KN, Vankerckhoven V.** 2013. Differences in gut  
7 microbiota composition between obese and lean children: a cross-sectional  
8 study. *Gut Pathog* **5**:10.
- 9 28. **Ferrer M, Ruiz A, Lanza F, Haange SB, Oberbach A, Till H, Bargiela R,**  
10 **Campoy C, Segura MT, Richter M, von Bergen M, Seifert J, Suarez A.** 2013.  
11 Microbiota from the distal guts of lean and obese adolescents exhibit partial  
12 functional redundancy besides clear differences in community structure. *Environ*  
13 *Microbiol* **15**:211-226.
- 14 29. **Walters WA, Xu Z, Knight R.** 2014. Meta-analyses of human gut microbes  
15 associated with obesity and IBD. *FEBS Lett* **588**:4223-4233.
- 16 30. **Sze MA, Schloss PD.** 2016. Looking for a Signal in the Noise: Revisiting Obesity  
17 and the Microbiome. *MBio* **7**.
- 18 31. **Caer C, Rouault C, Le Roy T, Poitou C, Aron-Wisnewsky J, Torcivia A,**  
19 **Bichet JC, Clement K, Guerre-Millo M, Andre S.** 2017. Immune cell-derived  
20 cytokines contribute to obesity-related inflammation, fibrogenesis and metabolic  
21 deregulation in human adipose tissue. *Sci Rep* **7**:3000.
- 22 32. **Chehimi M, Vidal H, Eljaafari A.** 2017. Pathogenic Role of IL-17-Producing  
23 Immune Cells in Obesity, and Related Inflammatory Diseases. *J Clin Med* **6**.
- 24 33. **Schulz MD, Atay C, Heringer J, Romrig FK, Schwitalla S, Aydin B, Ziegler**  
25 **PK, Varga J, Reindl W, Pommerenke C, Salinas-Riester G, Bock A, Alpert C,**  
26 **Blaut M, Polson SC, Brandl L, Kirchner T, Greten FR, Polson SW, Arkan**  
27 **MC.** 2014. High-fat-diet-mediated dysbiosis promotes intestinal carcinogenesis  
28 independently of obesity. *Nature* **514**:508-512.
- 29 34. **Everard A, Belzer C, Geurts L, Ouwerkerk JP, Druart C, Bindels LB, Guiot Y,**  
30 **Derrien M, Muccioli GG, Delzenne NM, de Vos WM, Cani PD.** 2013. Cross-talk  
31 between *Akkermansia muciniphila* and intestinal epithelium controls diet-induced  
32 obesity. *Proc Natl Acad Sci U S A* **110**:9066-9071.
- 33 35. **Dao MC, Everard A, Aron-Wisnewsky J, Sokolovska N, Prifti E, Verger EO,**  
34 **Kayser BD, Levenez F, Chilloux J, Hoyles L, Consortium MI-O, Dumas ME,**  
35 **Rizkalla SW, Dore J, Cani PD, Clement K.** 2016. *Akkermansia muciniphila* and  
36 improved metabolic health during a dietary intervention in obesity: relationship  
37 with gut microbiome richness and ecology. *Gut* **65**:426-436.
- 38 36. **Greer RL, Dong X, Moraes AC, Zielke RA, Fernandes GR, Peremyslova E,**  
39 **Vasquez-Perez S, Schoenborn AA, Gomes EP, Pereira AC, Ferreira SR, Yao**  
40 **M, Fuss IJ, Strober W, Sikora AE, Taylor GA, Gulati AS, Morgun A,**  
41 **Shulzhenko N.** 2016. *Akkermansia muciniphila* mediates negative effects of  
42 IFN $\gamma$  on glucose metabolism. *Nat Commun* **7**:13329.
- 43 37. **Drewes JL, White JR, Dejea CM, Fathi P, Iyadorai T, Vadivelu J, Roslani AC,**  
44 **Wick EC, Mongodin EF, Loke MF, Thulasi K, Gan HM, Goh KL, Chong HY,**  
45 **Kumar S, Wanyiri JW, Sears CL.** 2017. High-resolution bacterial 16S rRNA

- 1 gene profile meta-analysis and biofilm status reveal common colorectal cancer  
2 consortia. *NPJ Biofilms Microbiomes* **3**:34.
- 3 38. **Daquigan N, Seekatz AM, Greathouse KL, Young VB, White JR.** 2017. High-  
4 resolution profiling of the gut microbiome reveals the extent of *Clostridium difficile*  
5 burden. *NPJ Biofilms Microbiomes* **3**:35.
- 6 39. **Guerrero-Preston R, White JR, Godoy-Vitorino F, Rodriguez-Hilario A,**  
7 **Navarro K, Gonzalez H, Michailidi C, Jedlicka A, Canapp S, Bondy J,**  
8 **Dziedzic A, Mora-Lagos B, Rivera-Alvarez G, Ili-Gangas C, Brebi-Mieville P,**  
9 **Westra W, Koch W, Kang H, Marchionni L, Kim Y, Sidransky D.** 2017. High-  
10 resolution microbiome profiling uncovers *Fusobacterium nucleatum*,  
11 *Lactobacillus gasseri/johnsonii*, and *Lactobacillus vaginalis* associated to oral  
12 and oropharyngeal cancer in saliva from HPV positive and HPV negative patients  
13 treated with surgery and chemo-radiation. *Oncotarget* **8**:110931-110948.
- 14 40. **Byrd AL, Perez-Rogers JF, Manimaran S, Castro-Nallar E, Toma I,**  
15 **McCaffrey T, Siegel M, Benson G, Crandall KA, Johnson WE.** 2014. Clinical  
16 PathoScope: rapid alignment and filtration for accurate pathogen identification in  
17 clinical samples using unassembled sequencing data. *BMC Bioinformatics*  
18 **15**:262.
- 19 41. **Oh J, Byrd AL, Deming C, Conlan S, Program NCS, Kong HH, Segre JA.**  
20 2014. Biogeography and individuality shape function in the human skin  
21 metagenome. *Nature* **514**:59-64.
- 22 42. **Arumugam M, Raes J, Pelletier E, Le Paslier D, Yamada T, Mende DR,**  
23 **Fernandes GR, Tap J, Bruls T, Batto JM, Bertalan M, Borrueal N, Casellas F,**  
24 **Fernandez L, Gautier L, Hansen T, Hattori M, Hayashi T, Kleerebezem M,**  
25 **Kurokawa K, Leclerc M, Levenez F, Manichanh C, Nielsen HB, Nielsen T,**  
26 **Pons N, Poulain J, Qin J, Sicheritz-Ponten T, Tims S, Torrents D, Ugarte E,**  
27 **Zoetendal EG, Wang J, Guarner F, Pedersen O, de Vos WM, Brunak S, Dore**  
28 **J, Meta HITC, Antolin M, Artiguenave F, Blottiere HM, Almeida M, Brechot C,**  
29 **Cara C, Chervaux C, Cultrone A, Delorme C, Denariatz G, et al.** 2011.  
30 Enterotypes of the human gut microbiome. *Nature* **473**:174-180.
- 31 43. **Chen J, Bittinger K, Charlson ES, Hoffmann C, Lewis J, Wu GD, Collman**  
32 **RG, Bushman FD, Li H.** 2012. Associating microbiome composition with  
33 environmental covariates using generalized UniFrac distances. *Bioinformatics*  
34 **28**:2106-2113.
- 35 44. **Bates D, Mächler M, Bolker B, Walker S.** 2015. Fitting Linear Mixed-Effects  
36 Models Using lme4. 2015 **67**:48.
- 37 45. **Schwarzer G.** 2007. meta: An R package for meta-analysis, *R News*, *R News*.  
38 [https://cran.r-project.org/doc/Rnews/Rnews\\_2007-3.pdf](https://cran.r-project.org/doc/Rnews/Rnews_2007-3.pdf).
- 39 46. **Rossee Y.** 2012. lavaan: An R Package for Structural Equation Modeling. 2012  
40 **48**:36.
- 41 47. **Chen J, King E, Deek R, Wei Z, Yu Y, Grill D, Ballman K, Stegle O.** 2018. An  
42 omnibus test for differential distribution analysis of microbiome sequencing data.  
43 *Bioinformatics* **34**:643-651.
- 44 48. **Sze MA, Schloss PD.** 2018. Leveraging Existing 16S rRNA Gene Surveys To  
45 Identify Reproducible Biomarkers in Individuals with Colorectal Tumors. *MBio* **9**.

- 1 49. **Kellermayer R, Dowd SE, Harris RA, Balasa A, Schaible TD, Wolcott RD,**  
2 **Tatevian N, Szigeti R, Li Z, Versalovic J, Smith CW.** 2011. Colonic mucosal  
3 DNA methylation, immune response, and microbiome patterns in Toll-like  
4 receptor 2-knockout mice. *FASEB J* **25**:1449-1460.
- 5 50. **Garidou L, Pomie C, Klopp P, Waget A, Charpentier J, Aloulou M, Giry A,**  
6 **Serino M, Stenman L, Lahtinen S, Dray C, Iacovoni JS, Courtney M, Collet**  
7 **X, Amar J, Servant F, Lelouvier B, Valet P, Eberl G, Fazilleau N, Douin-**  
8 **Echinard V, Heymes C, Burcelin R.** 2015. The Gut Microbiota Regulates  
9 Intestinal CD4 T Cells Expressing ROR $\gamma$  and Controls Metabolic Disease.  
10 *Cell Metab* **22**:100-112.
- 11 51. **Moya-Perez A, Neef A, Sanz Y.** 2015. Bifidobacterium pseudocatenulatum  
12 CECT 7765 Reduces Obesity-Associated Inflammation by Restoring the  
13 Lymphocyte-Macrophage Balance and Gut Microbiota Structure in High-Fat Diet-  
14 Fed Mice. *PLoS One* **10**:e0126976.
- 15 52. **Schneeberger M, Everard A, Gomez-Valades AG, Matamoros S, Ramirez S,**  
16 **Delzenne NM, Gomis R, Claret M, Cani PD.** 2015. Akkermansia muciniphila  
17 inversely correlates with the onset of inflammation, altered adipose tissue  
18 metabolism and metabolic disorders during obesity in mice. *Sci Rep* **5**:16643.
- 19 53. **Zeng H, Ishaq SL, Zhao FQ, Wright AG.** 2016. Colonic inflammation  
20 accompanies an increase of beta-catenin signaling and  
21 Lachnospiraceae/Streptococcaceae bacteria in the hind gut of high-fat diet-fed  
22 mice. *J Nutr Biochem* **35**:30-36.
- 23 54. **Zhao S, Liu W, Wang J, Shi J, Sun Y, Wang W, Ning G, Liu R, Hong J.** 2017.  
24 Akkermansia muciniphila improves metabolic profiles by reducing inflammation in  
25 chow diet-fed mice. *J Mol Endocrinol* **58**:1-14.
- 26 55. **Thaiss CA, Levy M, Grosheva I, Zheng D, Soffer E, Blacher E, Braverman S,**  
27 **Tengeler AC, Barak O, Elazar M, Ben-Zeev R, Lehavi-Regev D, Katz MN,**  
28 **Pevsner-Fischer M, Gertler A, Halpern Z, Harmelin A, Aamar S, Serradas P,**  
29 **Grosfeld A, Shapiro H, Geiger B, Elinav E.** 2018. Hyperglycemia drives  
30 intestinal barrier dysfunction and risk for enteric infection. *Science* **359**:1376-  
31 1383.
- 32 56. **Liu R, Hong J, Xu X, Feng Q, Zhang D, Gu Y, Shi J, Zhao S, Liu W, Wang X,**  
33 **Xia H, Liu Z, Cui B, Liang P, Xi L, Jin J, Ying X, Wang X, Zhao X, Li W, Jia H,**  
34 **Lan Z, Li F, Wang R, Sun Y, Yang M, Shen Y, Jie Z, Li J, Chen X, Zhong H,**  
35 **Xie H, Zhang Y, Gu W, Deng X, Shen B, Xu X, Yang H, Xu G, Bi Y, Lai S,**  
36 **Wang J, Qi L, Madsen L, Wang J, Ning G, Kristiansen K, Wang W.** 2017. Gut  
37 microbiome and serum metabolome alterations in obesity and after weight-loss  
38 intervention. *Nat Med* **23**:859-868.
- 39 57. **Higashimura Y, Naito Y, Takagi T, Uchiyama K, Mizushima K, Ushiroda C,**  
40 **Ohnogi H, Kudo Y, Yasui M, Inui S, Hisada T, Honda A, Matsuzaki Y,**  
41 **Yoshikawa T.** 2016. Protective effect of agaro-oligosaccharides on gut dysbiosis  
42 and colon tumorigenesis in high-fat diet-fed mice. *Am J Physiol Gastrointest Liver*  
43 *Physiol* **310**:G367-375.
- 44 58. **Liu W, Crott JW, Lyu L, Pfalzer AC, Li J, Choi SW, Yang Y, Mason JB, Liu Z.**  
45 2016. Diet- and Genetically-induced Obesity Produces Alterations in the

- 1 Microbiome, Inflammation and Wnt Pathway in the Intestine of Apc(+/-1638N)  
2 Mice: Comparisons and Contrasts. *J Cancer* 7:1780-1790.
- 3 59. **Koh GY, Kane A, Lee K, Xu Q, Wu X, Roper J, Mason JB, Crott JW.** 2018.  
4 Parabacteroides distasonis attenuates toll-like receptor 4 signaling and Akt  
5 activation and blocks colon tumor formation in high-fat diet-fed azoxymethane-  
6 treated mice. *Int J Cancer* doi:10.1002/ijc.31559.
- 7 60. **Hanyuda A, Cao Y, Hamada T, Nowak JA, Qian ZR, Masugi Y, da Silva A,  
8 Liu L, Kosumi K, Soong TR, Jhun I, Wu K, Zhang X, Song M, Meyerhardt JA,  
9 Chan AT, Fuchs CS, Giovannucci EL, Ogino S, Nishihara R.** 2017. Body  
10 mass index and risk of colorectal carcinoma subtypes classified by tumor  
11 differentiation status. *Eur J Epidemiol* 32:393-407.
- 12 61. **Li Liua FKT, Xuehong Zhanga, Jonathan A. Nowaka, Zhi Rong Qian,  
13 Tsuyoshi Hamada, Daniel Nevo, Susan Bullman, Kosuke Mima, Keisuke  
14 Kosumi, Annacarolina da Silva, Mingyang Song, Yin Cao, Tyler S. Twombly,  
15 Yan Shi, Hongli Liu, Mancang Gu, Hideo Koh, Wanwan Li, Chunxia Du,  
16 Yang Chen, Chenxi Li, Wenbin Li, Raaj S. Mehta, Kana Wu, Molin Wang,  
17 Aleksander D. Kostic, Marios Giannakis, Wendy S. Garrett, Curtis  
18 Hutthenhower, Andrew T. Chan, Charles S. Fuchs, Reiko Nishiharab, Shuji  
19 Ogino'**Correspondence information about the author Shuji Oginob,Email  
20 the author Shuji Ogino, Edward L. Giovannuccib. 2018. Diets That Promote  
21 Colon Inflammation Associate With Risk of Colorectal Carcinomas That Contain  
22 Fusobacterium nucleatum. *Clinical Gastroenterology and Hepatology*  
23 doi:10.1016/j.cgh.2018.04.030.
- 24 62. **Hanyuda A, Ogino S, Qian ZR, Nishihara R, Song M, Mima K, Inamura K,  
25 Masugi Y, Wu K, Meyerhardt JA, Chan AT, Fuchs CS, Giovannucci EL, Cao  
26 Y.** 2016. Body mass index and risk of colorectal cancer according to tumor  
27 lymphocytic infiltrate. *Int J Cancer* 139:854-868.
- 28 63. **Sinicrope FA, Foster NR, Yoon HH, Smyrk TC, Kim GP, Allegra CJ, Yothers  
29 G, Nikcevich DA, Sargent DJ.** 2012. Association of obesity with DNA mismatch  
30 repair status and clinical outcome in patients with stage II or III colon carcinoma  
31 participating in NCCTG and NSABP adjuvant chemotherapy trials. *J Clin Oncol*  
32 30:406-412.
- 33 64. **O'Keefe SJ, Li JV, Lahti L, Ou J, Carbonero F, Mohammed K, Posma JM,  
34 Kinross J, Wahl E, Ruder E, Vippera K, Naidoo V, Mtshali L, Tims S,  
35 Puylaert PG, DeLany J, Krasinskas A, Benefiel AC, Kaseb HO, Newton K,  
36 Nicholson JK, de Vos WM, Gaskins HR, Zoetendal EG.** 2015. Fat, fibre and  
37 cancer risk in African Americans and rural Africans. *Nat Commun* 6:6342.
- 38 65. **Liu L, Nishihara R, Qian ZR, Tabung FK, Nevo D, Zhang X, Song M, Cao Y,  
39 Mima K, Masugi Y, Shi Y, da Silva A, Twombly T, Gu M, Li W, Hamada T,  
40 Kosumi K, Inamura K, Nowak JA, Drew DA, Lochhead P, Nosho K, Wu K,  
41 Wang M, Garrett WS, Chan AT, Fuchs CS, Giovannucci EL, Ogino S.** 2017.  
42 Association Between Inflammatory Diet Pattern and Risk of Colorectal  
43 Carcinoma Subtypes Classified by Immune Responses to Tumor.  
44 *Gastroenterology* 153:1517-1530.e1514.
- 45 66. **Liu L, Tabung FK, Zhang X, Nowak JA, Qian ZR, Hamada T, Nevo D,  
46 Bullman S, Mima K, Kosumi K, da Silva A, Song M, Cao Y, Twombly TS, Shi**

- 1        **Y, Liu H, Gu M, Koh H, Li W, Du C, Chen Y, Li C, Li W, Mehta RS, Wu K,**  
2        **Wang M, Kostic AD, Giannakis M, Garrett WS, Huttenhower C, Chan AT,**  
3        **Fuchs CS, Nishihara R, Ogino S, Giovannucci EL.** Diets That Promote Colon  
4        Inflammation Associate With Risk of Colorectal Carcinomas That Contain  
5        *Fusobacterium nucleatum*. *Clinical Gastroenterology and Hepatology*  
6        doi:10.1016/j.cgh.2018.04.030.
- 7        67. **Yu D, Zheng W, Johansson M, Lan Q, Park Y, White E, Matthews CE,**  
8        **Sawada N, Gao YT, Robien K, Sinha R, Langhammer A, Kaaks R,**  
9        **Giovannucci EL, Liao LM, Xiang YB, Lazovich D, Peters U, Zhang X, Bueno-**  
10       **de-Mesquita B, Willett WC, Tsugane S, Takata Y, Smith-Warner SA, Blot W,**  
11       **Shu XO.** 2018. Overall and Central Obesity and Risk of Lung Cancer: A Pooled  
12       Analysis. *J Natl Cancer Inst* doi:10.1093/jnci/djx286.
- 13       68. **Sinha R, Abu-Ali G, Vogtmann E, Fodor AA, Ren B, Amir A, Schwager E,**  
14       **Crabtree J, Ma S, Microbiome Quality Control Project C, Abnet CC, Knight**  
15       **R, White O, Huttenhower C.** 2017. Assessment of variation in microbial  
16       community amplicon sequencing by the Microbiome Quality Control (MBQC)  
17       project consortium. *Nat Biotechnol* **35**:1077-1086.
- 18       69. **Sinha R, Abnet CC, White O, Knight R, Huttenhower C.** 2015. The  
19       microbiome quality control project: baseline study design and future directions.  
20       *Genome Biol* **16**:276.
- 21       70. **Olson ND, Morrow JB.** 2012. DNA extract characterization process for microbial  
22       detection methods development and validation. *BMC Res Notes* **5**:668.
- 23       71. **Knight R, Vrbanc A, Taylor BC, Aksenov A, Callewaert C, Debelius J,**  
24       **Gonzalez A, Kosciolk T, McCall LI, McDonald D, Melnik AV, Morton JT,**  
25       **Navas J, Quinn RA, Sanders JG, Swafford AD, Thompson LR, Tripathi A, Xu**  
26       **ZZ, Zaneveld JR, Zhu Q, Caporaso JG, Dorrestein PC.** 2018. Best practices  
27       for analysing microbiomes. *Nat Rev Microbiol* doi:10.1038/s41579-018-0029-9.

28  
29  
30



## Figure Legends

### Figure 1:

Variance in ability of alpha diversity to predict odds ( $\log_2$ ) of CRC controlling for obesity and study confounders. The  $\log_2$  odds ratio of CRC using observed OTUs (left panel) or Shannon Index (right panel) as predictors. The multilevel model includes obesity (level 1), and sequencing method (16S rRNA or WGS) and variable region (V4 or V3-4) (level 2) as coefficients.

### Figure 2:

Alpha diversity in individuals with or without obesity and with or without CRC  
A) Observed OTUs and Shannon diversity in individuals without CRC B) or with CRC comparing individuals with or without obesity. Reporting p-values are from Mann-Whitney U Test comparing the alpha diversity of individuals with or without obesity.

### Figure 3:

Microbial classifiers of CRC and obesity-associated CRC.  
A) Receiver Operating Curve (ROC) for the random forest classification analyses for obese vs. non-obese in individuals with CRC for each study. AUC is the 10-fold cross validated area under the curve. B) ROC for the random forest classification analyses of obese vs. non-obese in individuals with adenomas for each study. Due to a lack of cases with adenomas in some studies a random forest was not possible and are therefore not shown. C) ROC for the random forest classification analyses of CRC vs non-CRC in each dataset adjusted for BMI, age and sex.

### Figure 4:

Pathway abundance analysis in individuals with or without obesity among individuals with or without CRC.  
Relative abundance of KEGG metabolic pathways (16S rRNA) or modules (WGS) inferred from PICRUSt or HUMAnN, respectively. Significance was calculated using the Wilcoxon test correction for multiple hypothesis testing; asterisks are representative of significance at adjusted p-value <0.2.

## Supplemental Figures

### Figure S1:

Probability of having CRC using alpha diversity as a predictor among individuals with obesity. Predicted probability of having CRC using A) observed OTUs or B) Shannon Index.

### Figure S2:

Alpha diversity by BMI in individuals with or without CRC  
A) Observed OTUs and Shannon diversity in individuals without CRC comparing BMI and alpha diversity metric, observed OTUs or Shannon diversity respectively. B)

Observed OTUs and Shannon diversity in individuals with CRC comparing BMI and alpha diversity metric, observed OTUs or Shannon diversity respectively.

**Figure S3:**

Beta diversity in individual with or without obesity and with or without CRC

A) Differences in community composition between individuals with and without obesity among those without CRC B) or with CRC. The axes were found using PCoA using Bray-Curtis distances among points with the proportion of variance accounted for by each axis reported. Points are colored by obesity status.

**Figure S4:**

Differential abundance of taxa associated with obesity and CRC taxa.

OTUs (16S rRNA) or species (WGS) log<sub>10</sub> scale relative abundance of *Ruminococcus spp.*, *Coprococcus spp.*, *Bacteroides spp.*, *Bifidobacterium spp.* and *Akkermansia muciniphila*. P-values were calculated using negative binomial regression using abundance as a count and including age and sex as covariates. Significant differences between obese v non-obese with or without CRC are denoted by an asterisk (FDR adjusted p-value <0.1)

**Figure S5:**

Ability of CRC-associated taxa to predict CRC among individuals with obesity.

For each species identified from previous CRC microbiome studies, *F. nucleatum*, *F. prausnitzii*, *B. fragilis*, or *A. muciniphila*, the log<sub>2</sub> odd ratio was calculated for individuals with obesity to determine odds of being classified as having CRC.

Study

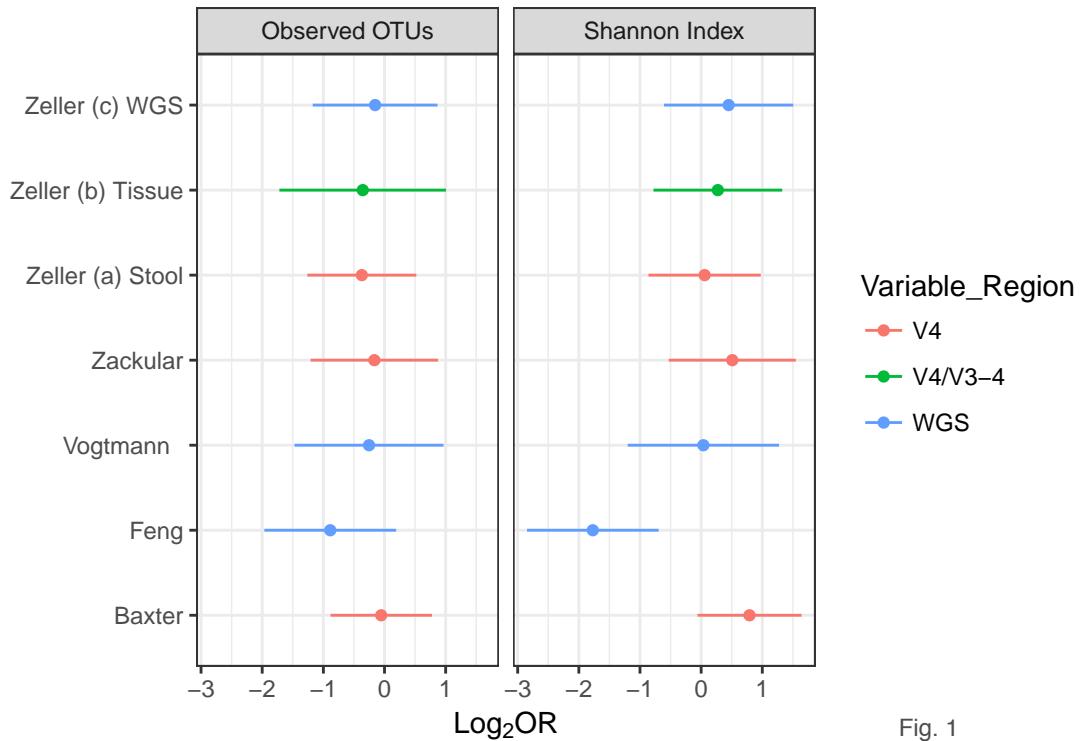

Fig. 1

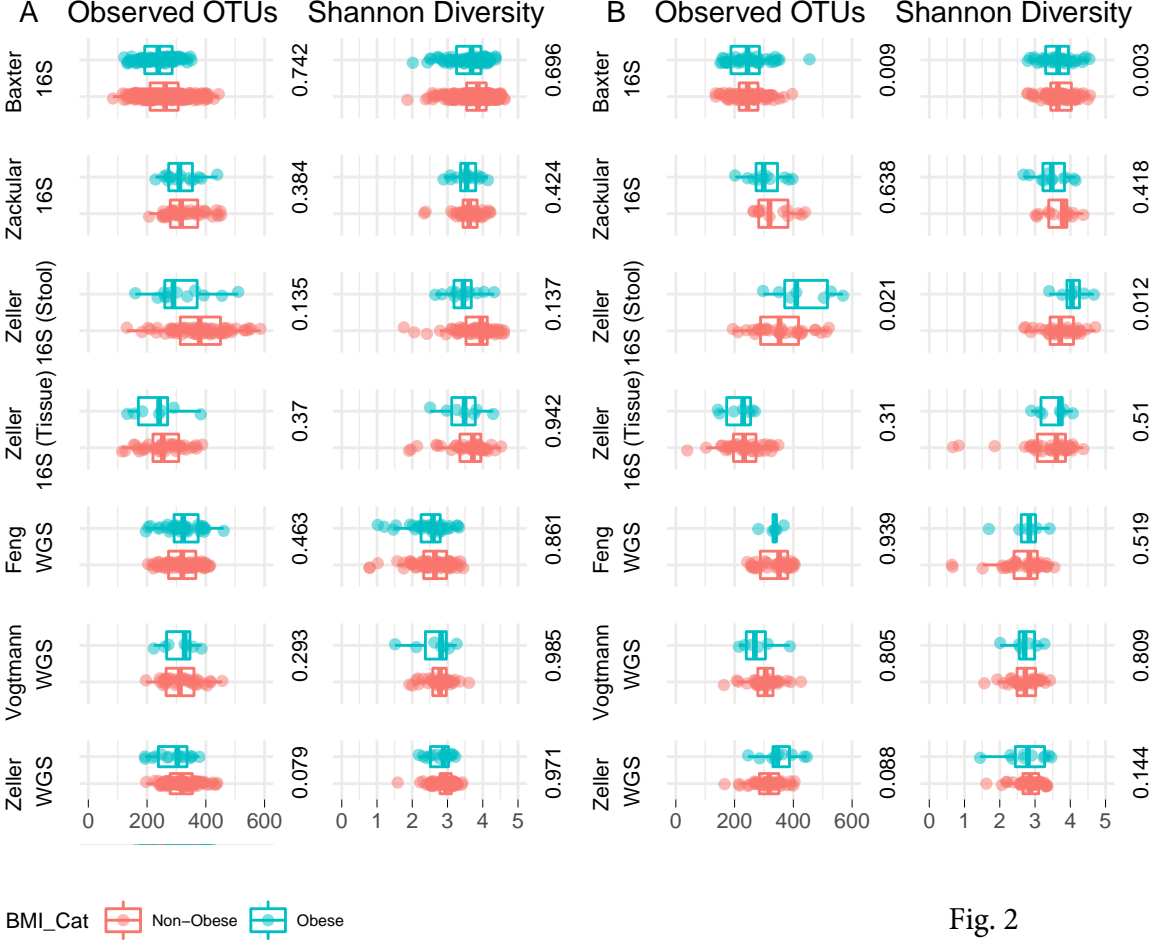

Fig. 2

A

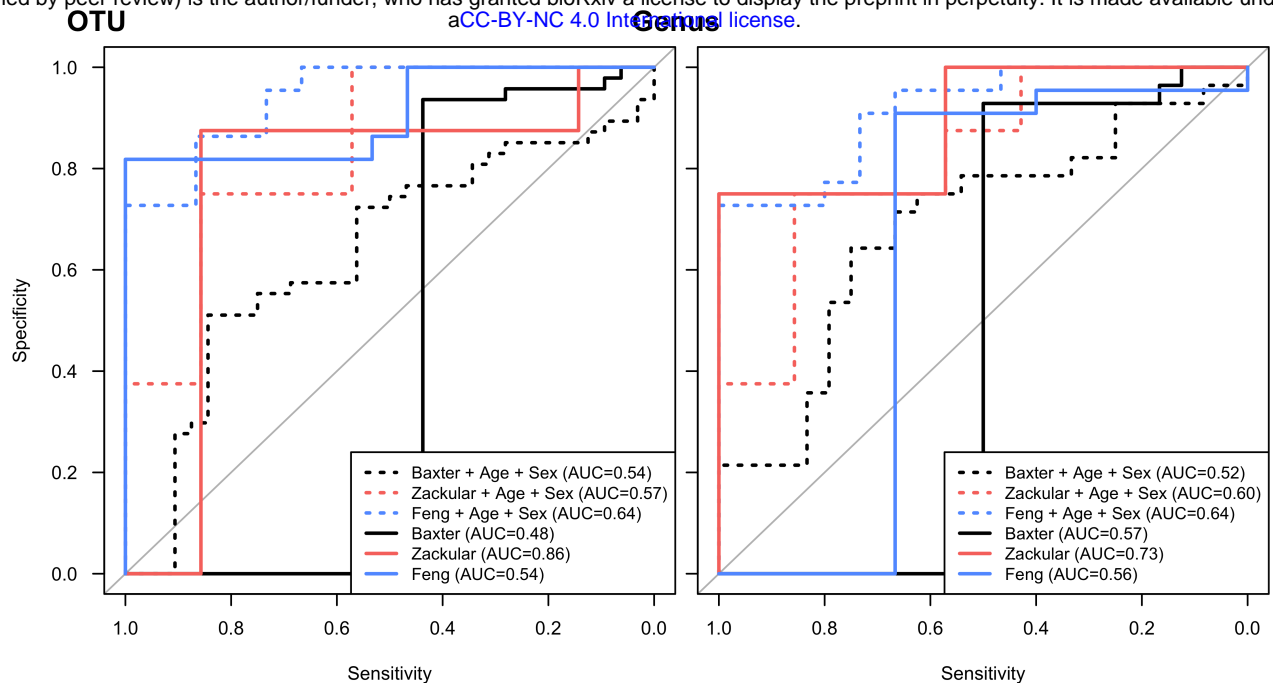

B

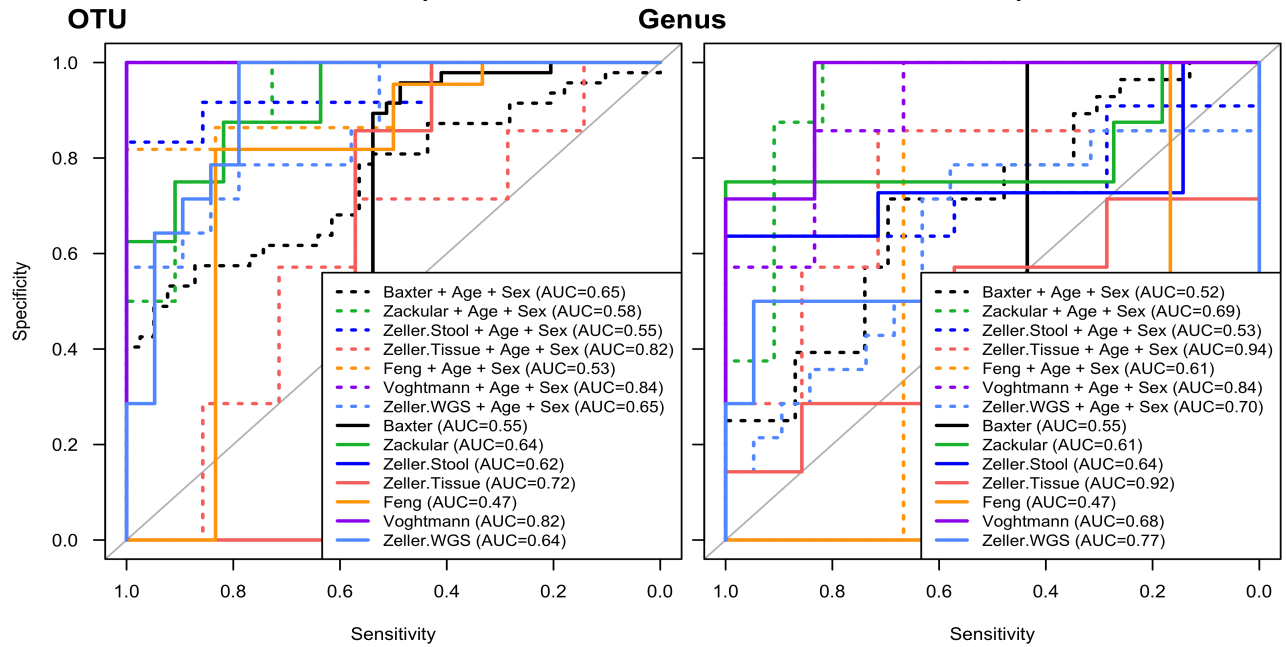

C

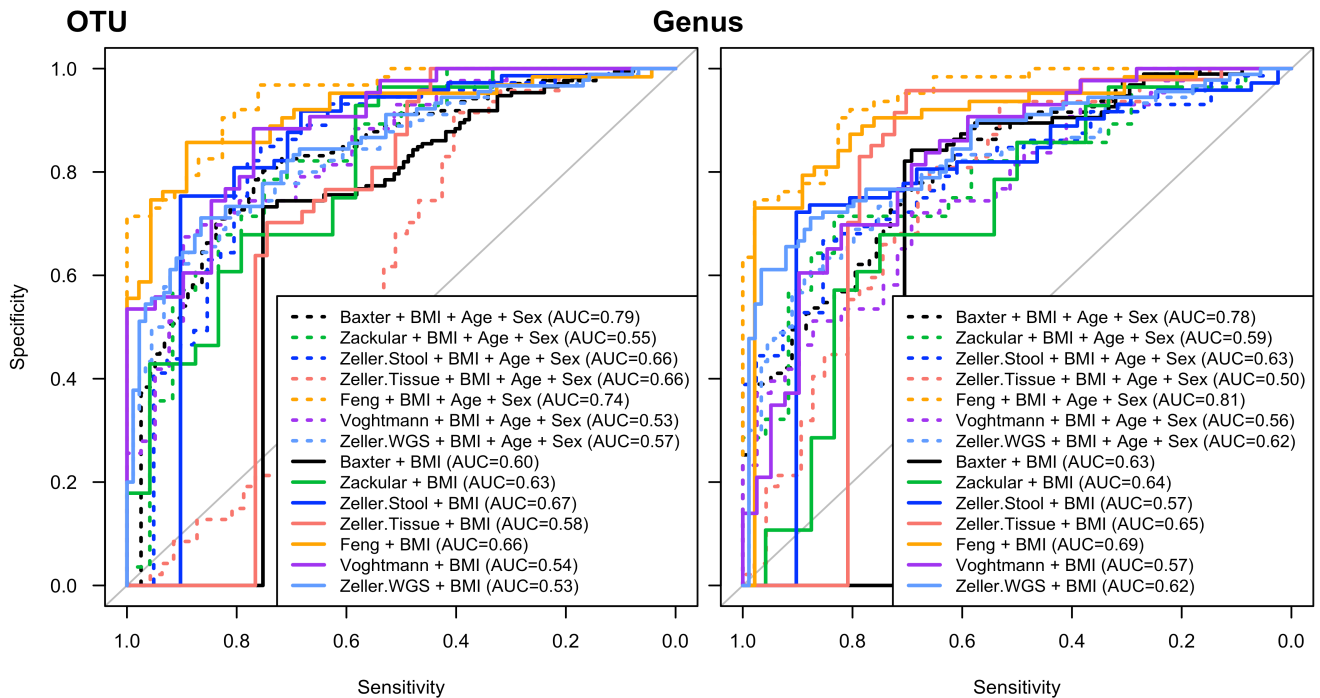

Fig. 3

**A****Microbial Function in individuals without CRC**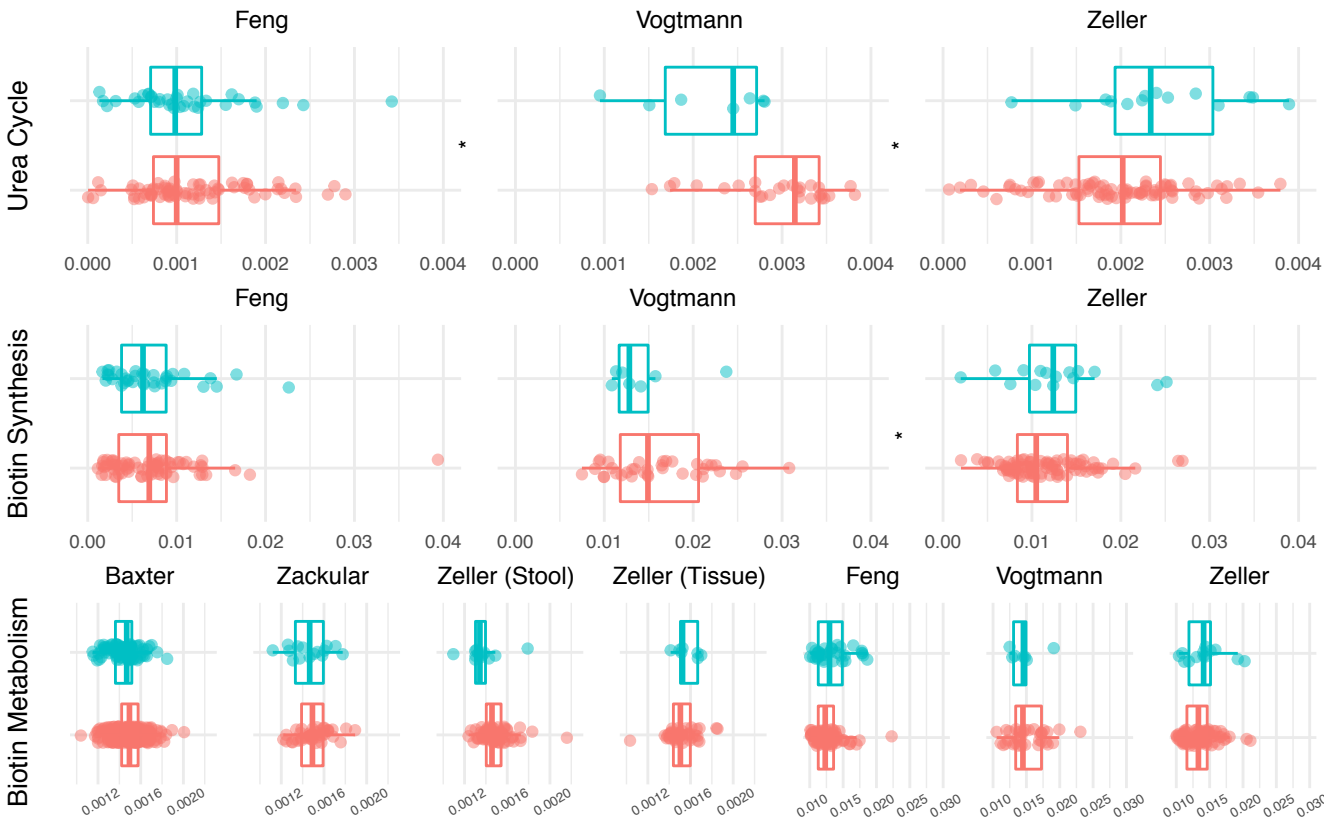**B****Microbial Function in individuals with CRC**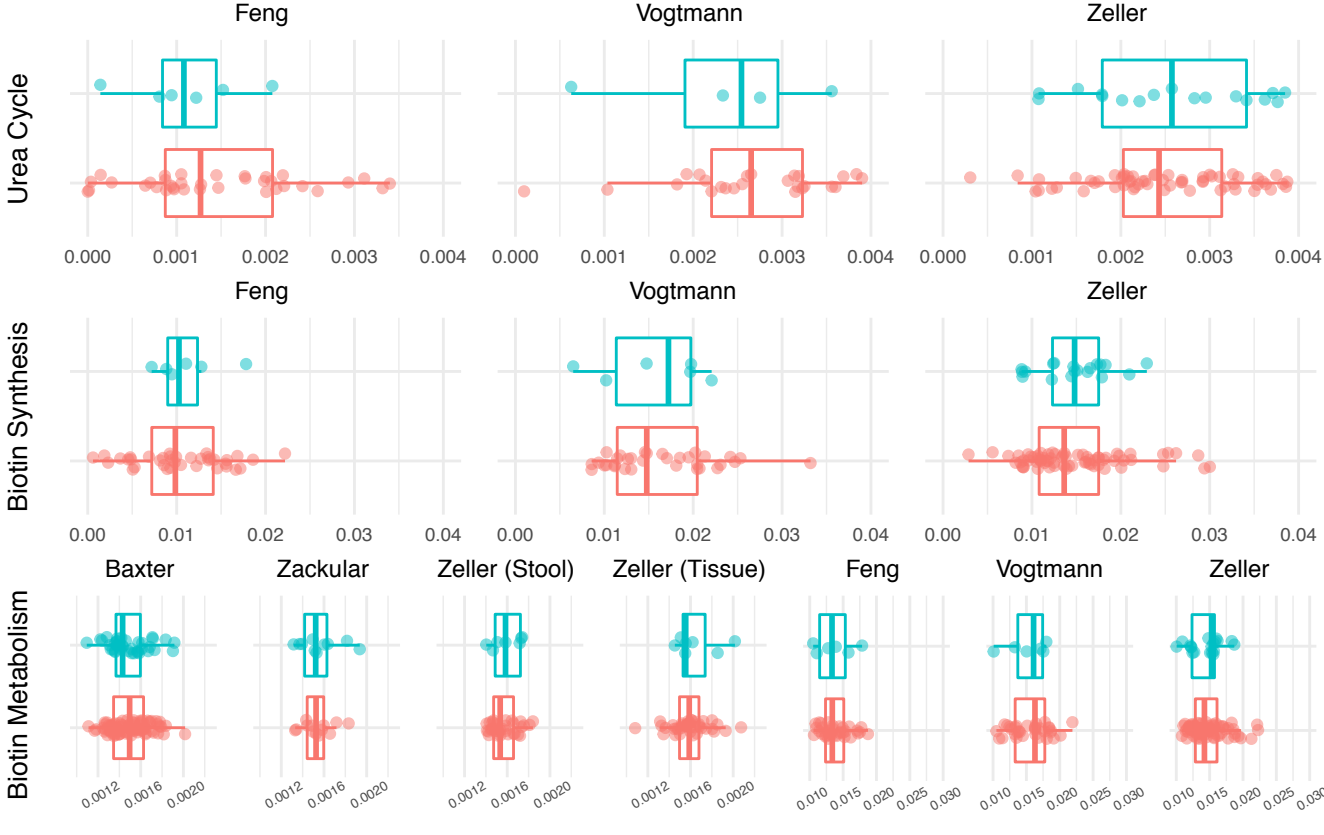

BMI\_Cat ▭ Non-Obese ▭ Obese

**Fig. 4**

**Table 1: Summary of obesity, demographic, sequencing, and reads for included data sources**

| Database (Study)       | Sample Type | Sequencing Method | Primers * | Species/OTUs <sup>#</sup> | Sample Source (N)                           | Sample Size by Group |           | Average BMI |           | P (obese v non-obese) <sup>^</sup> |
|------------------------|-------------|-------------------|-----------|---------------------------|---------------------------------------------|----------------------|-----------|-------------|-----------|------------------------------------|
|                        |             |                   |           |                           |                                             | Obese                | Non-Obese | Obese       | Non-Obese |                                    |
| Baxter et al. (2016)   | Stool       | 16S rRNA          | V4        | 9997                      | carcinoma(318); control (172)               | 118                  | 368       | 34.05       | 24.93     | < .001                             |
| Feng et al. (2015)     | Stool       | WGS               | NA        | 408772                    | adenoma (42); carcinoma (41); control (55)  | 43                   | 113       | 31.98       | 25.62     | < .001                             |
| Vogtmann et al. (2016) | Stool       | WGS               | NA        | 356748                    | carcinoma (52); control (52)                | 13                   | 69        | 32.57       | 23.58     | < .001                             |
| Zackular et al. (2014) | Stool       | 16S rRNA          | V4        | 24990                     | adenoma (30); carcinoma (30); control (30)  | 26                   | 56        | 33.84       | 25.09     | 0.002                              |
| Zeller et al. (2014)a  | Stool       | 16S rRNA          | V4        | 9969                      | control (75); CRC (41)                      | 19                   | 108       | 32.53       | 24.13     | < .001                             |
| Zeller et al. (2014)b  | Tissue      | 16S rRNA          | V4/V3-4   | 9988                      | carcinoma (48); carcinoma-adjacent (48)     | 14                   | 80        | 33.3        | 24.5      | < .001                             |
| Zeller et al. (2014)c  | Stool       | WGS               | NA        | 327491                    | adenoma (42); carcinoma (53); control (297) | 34                   | 160       | 32.15       | 24.18     | < .001                             |

\*1 Primers are NA for WGS

# Average number of observed taxonomic units (16S rRNA) or species (WGS). Averages were rounded to nearest whole number.

<sup>^</sup> Test of the equality of proportion of individuals that are obese vs. non-obese.

**Table 2: Summary of Alpha-Diversity Analysis**

| Type            | Reference (Sample)             | Observed       |              | Shannon       |              |
|-----------------|--------------------------------|----------------|--------------|---------------|--------------|
|                 |                                | Linear (Est.)  | p-value      | Linear (Est.) | p-value      |
| <b>16S rRNA</b> | <b>Baxter et al. (Stool)</b>   |                |              |               |              |
|                 | <i>Non-CRC - Ob v Non-Ob</i>   | -22.756        | 0.064        | <b>-0.173</b> | <b>0.046</b> |
|                 | <i>CRC - Ob v Non-Ob</i>       | -1.283         | 0.930        | -0.059        | 0.564        |
|                 | <b>Zackular et al. (Stool)</b> |                |              |               |              |
|                 | <i>Non-CRC - Ob v Non-Ob</i>   | -36.737        | 0.248        | -0.240        | 0.217        |
|                 | <i>CRC - Ob v Non-Ob</i>       | 7.006          | 0.811        | 0.053         | 0.794        |
|                 | <b>Zeller et al. (Stool)</b>   |                |              |               |              |
|                 | <i>Non-CRC - Ob v Non-Ob</i>   | <b>-86.434</b> | <b>0.049</b> | -0.455        | 0.051        |
|                 | <i>CRC - Ob v Non-Ob</i>       | -42.696        | 0.551        | -0.020        | 0.953        |
|                 | <b>Zeller et al. (Tissue)</b>  |                |              |               |              |
|                 | <i>Non-CRC - Ob v Non-Ob</i>   | -14.373        | 0.682        | -0.019        | 0.949        |
|                 | <i>CRC - Ob v Non-Ob</i>       | -12.389        | 0.683        | 0.140         | 0.690        |
| <b>WGS</b>      | <b>Vogtmann et al. (Stool)</b> |                |              |               |              |
|                 | <i>Non-CRC - Ob v Non-Ob</i>   | -25.023        | 0.399        | -0.165        | 0.372        |
|                 | <i>CRC - Ob v Non-Ob</i>       | -9.187         | 0.698        | -0.025        | 8.971        |
|                 | <b>Feng et al. (Stool)</b>     |                |              |               |              |
|                 | <i>Non-CRC - Ob v Non-Ob</i>   | -27.211        | 0.204        | -0.327        | 0.085        |
|                 | <i>CRC - Ob v Non-Ob</i>       | 21.947         | 0.348        | 0.389         | 0.183        |
|                 | <b>Zeller et al. (Stool)</b>   |                |              |               |              |
|                 | <i>Non-CRC - Ob v Non-Ob</i>   | -21.877        | 0.157        | <b>-0.219</b> | <b>0.041</b> |
|                 | <i>CRC - Ob v Non-Ob</i>       | 3.592          | 0.832        | -0.031        | 0.813        |



**Table 3: Summary of Beta-Diversity Analysis**

| Type                         | Reference (Sample)             | UniFrac      |              | GUniFrac     |              | WUniFrac     |              | Bray-Curtis  |              | Jaccard      |              | Omnibus test |              |  |
|------------------------------|--------------------------------|--------------|--------------|--------------|--------------|--------------|--------------|--------------|--------------|--------------|--------------|--------------|--------------|--|
|                              |                                | F            | p-value      | F            | p-value      | F            | p-value      | F            | p-value      | F            | p-value      | p-value      |              |  |
| 16S rRNA                     | <b>Baxter et al. (Stool)</b>   |              |              |              |              |              |              |              |              |              |              |              |              |  |
|                              | <i>Non-CRC - Ob v Non-Ob</i>   | <b>1.852</b> | <b>0.011</b> | <b>1.871</b> | <b>0.027</b> | 1.798        | 0.111        | <b>1.792</b> | <b>0.019</b> |              |              |              | <b>0.024</b> |  |
|                              | <i>CRC - Ob v Non-Ob</i>       | 1.156        | 0.175        | 1.221        | 0.179        | 0.897        | 0.422        | 1.452        | 0.069        |              |              |              | 0.136        |  |
|                              | <b>Zackular et al. (Stool)</b> |              |              |              |              |              |              |              |              |              |              |              |              |  |
|                              | <i>Non-CRC - Ob v Non-Ob</i>   | 1.314        | 0.088        | <b>1.784</b> | <b>0.022</b> | <b>2.824</b> | <b>0.007</b> | <b>1.494</b> | <b>0.054</b> |              |              |              | <b>0.015</b> |  |
|                              | <i>CRC - Ob v Non-Ob</i>       | 1.191        | 0.166        | 1.479        | 0.093        | 2.183        | 0.050        | 1.368        | 0.094        |              |              |              | 0.117        |  |
|                              | <b>Zeller et al. (Stool)</b>   |              |              |              |              |              |              |              |              |              |              |              |              |  |
|                              | <i>Non-CRC - Ob v Non-Ob</i>   | <b>1.691</b> | <b>0.006</b> | <b>1.565</b> | <b>0.040</b> | 1.387        | 0.180        | 1.393        | 0.101        |              |              |              | <b>0.014</b> |  |
|                              | <i>CRC - Ob v Non-Ob</i>       | 1.132        | 0.208        | 1.127        | 0.280        | 1.394        | 0.178        | 1.142        | 0.276        |              |              |              | 0.327        |  |
|                              | <b>Zeller et al. (Tissue)</b>  |              |              |              |              |              |              |              |              |              |              |              |              |  |
| <i>Non-CRC - Ob v Non-Ob</i> | 1.159                          | 0.189        | 1.411        | 0.060        | 1.596        | 0.095        | <b>1.597</b> | <b>0.027</b> |              |              |              | 0.066        |              |  |
| <i>CRC - Ob v Non-Ob</i>     | 1.353                          | 0.056        | 1.125        | 0.275        | 0.880        | 0.548        | 1.106        | 0.307        |              |              |              | 0.136        |              |  |
| WGS                          | <b>Vogtmann et al. (Stool)</b> |              |              |              |              |              |              |              |              |              |              |              |              |  |
|                              | <i>Non-CRC - Ob v Non-Ob</i>   |              |              |              |              |              |              | 0.897        | 0.485        | 1.041        | 0.422        | 0.508        |              |  |
|                              | <i>CRC - Ob v Non-Ob</i>       |              |              |              |              |              |              | 1.086        | 0.357        | 1.068        | 0.355        | 0.426        |              |  |
|                              | <b>Feng et al. (Stool)</b>     |              |              |              |              |              |              |              |              |              |              |              |              |  |
|                              | <i>Non-CRC - Ob v Non-Ob</i>   |              |              |              |              |              |              | <b>3.129</b> | <b>0.003</b> | <b>4.144</b> | <b>0.008</b> | <b>0.004</b> |              |  |
|                              | <i>CRC - Ob v Non-Ob</i>       |              |              |              |              |              |              | <b>2.923</b> | <b>0.019</b> | <b>4.972</b> | <b>0.008</b> | <b>0.010</b> |              |  |
|                              | <b>Zeller et al. (Stool)</b>   |              |              |              |              |              |              |              |              |              |              |              |              |  |
|                              | <i>Non-CRC - Ob v Non-Ob</i>   |              |              |              |              |              |              | 1.821        | 0.081        | <b>2.892</b> | <b>0.047</b> | 0.065        |              |  |
|                              | <i>CRC - Ob v Non-Ob</i>       |              |              |              |              |              |              | 1.025        | 0.382        | 0.972        | 0.424        | 0.461        |              |  |

**A****Relationship between Model Observed OTUs and CRC Status**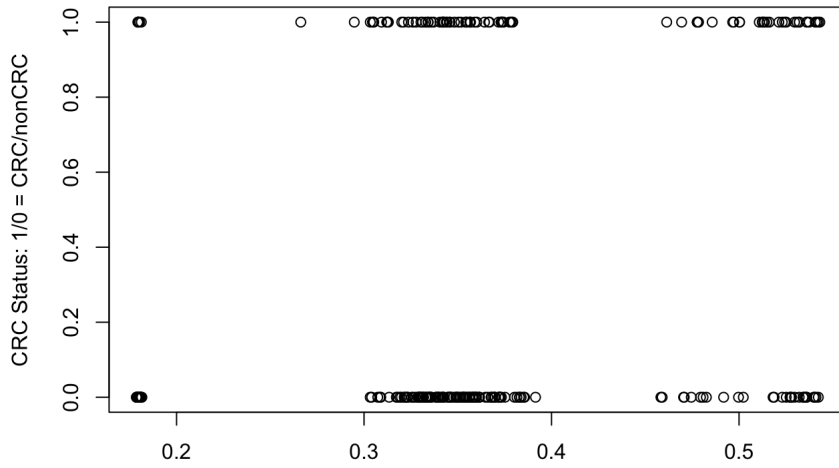**B****Relationship between Model Shannon Index and CRC Status**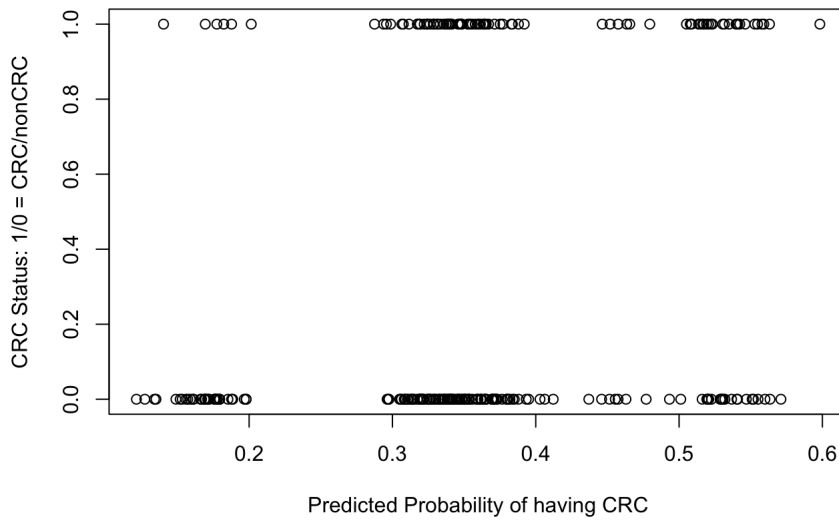**Fig. S1**

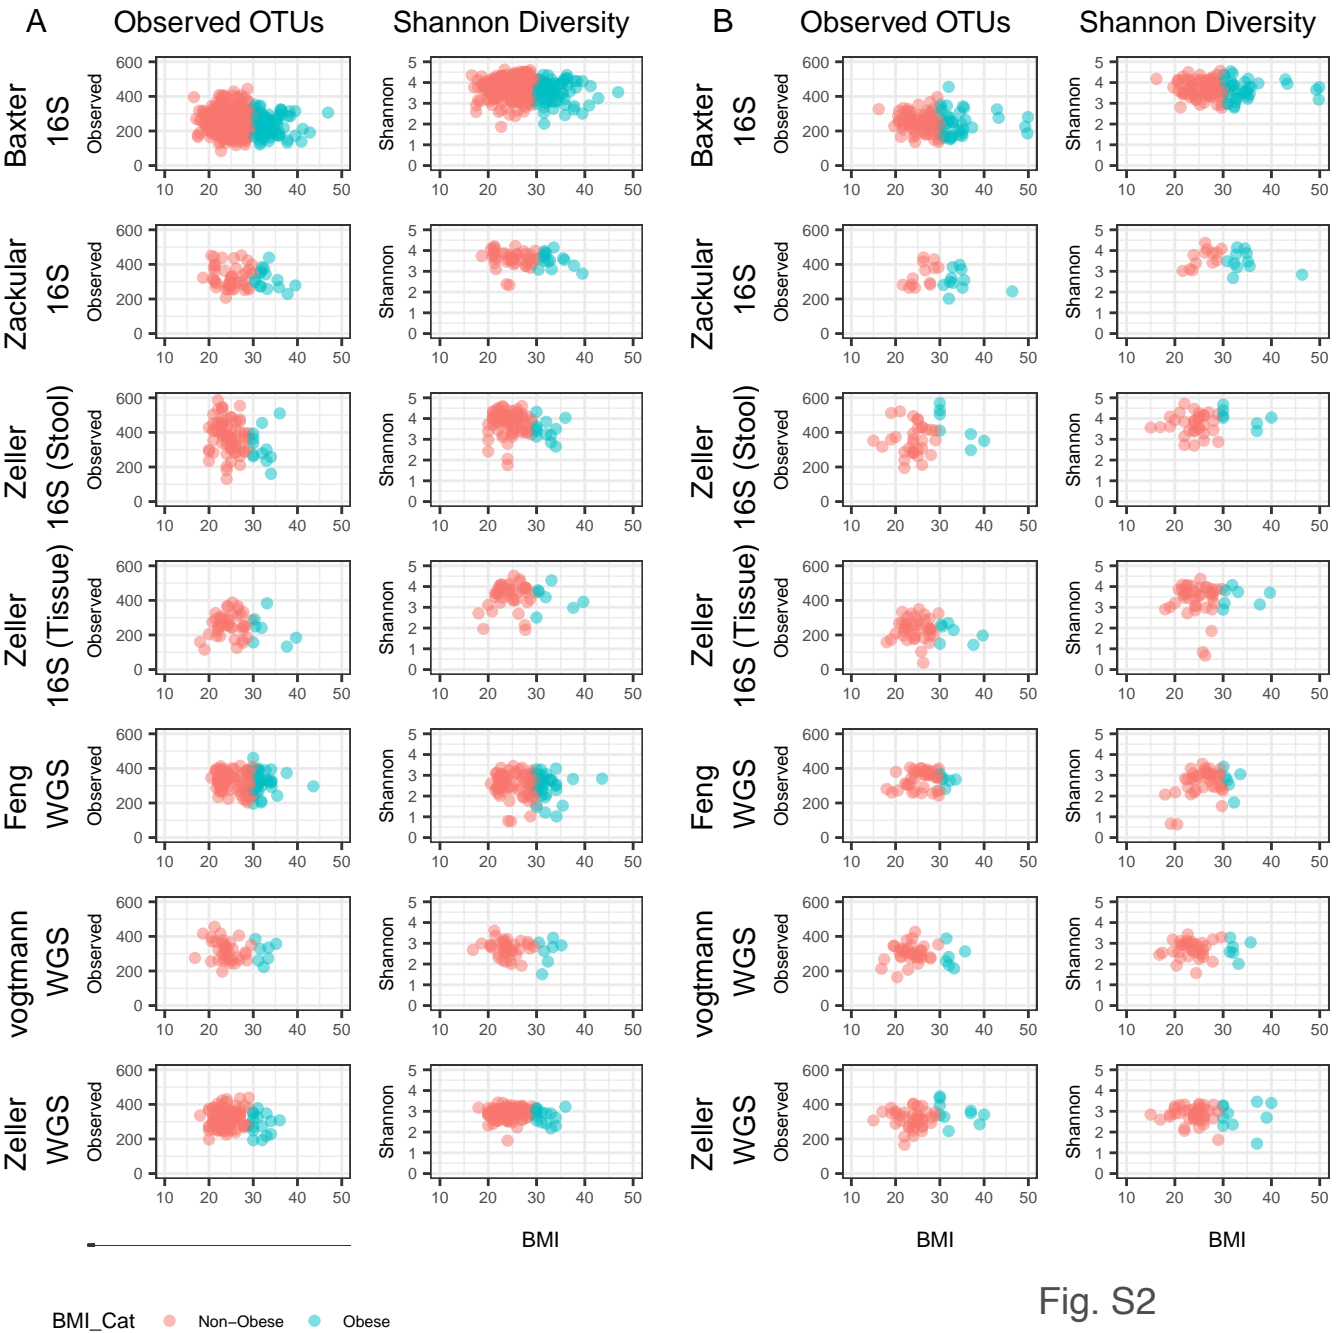

Fig. S2

A

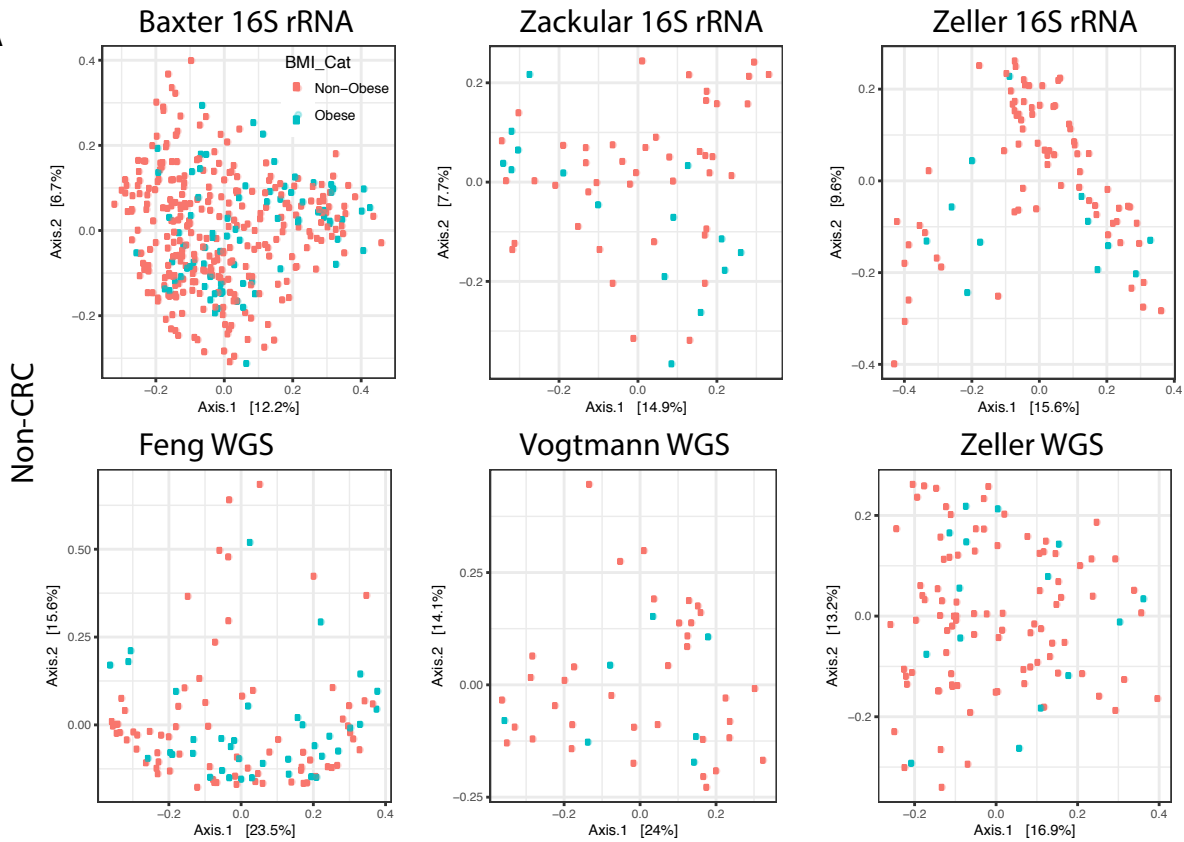

B

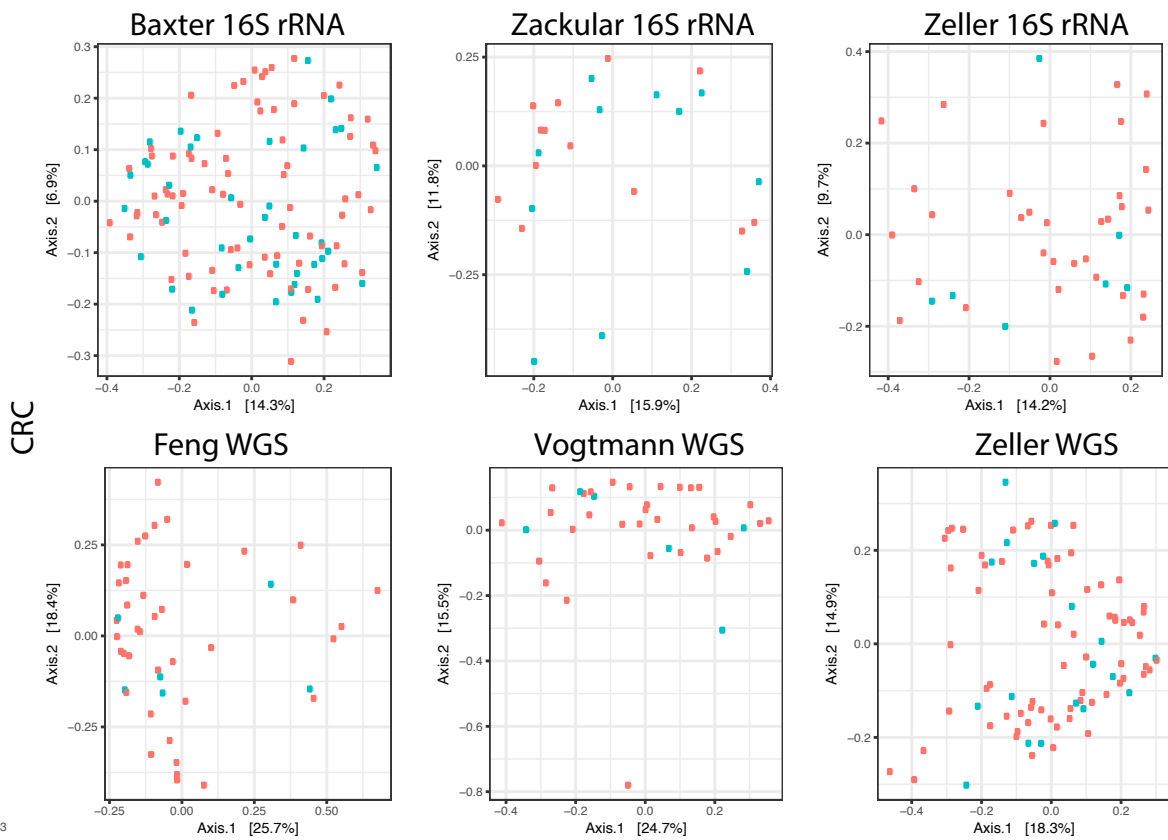

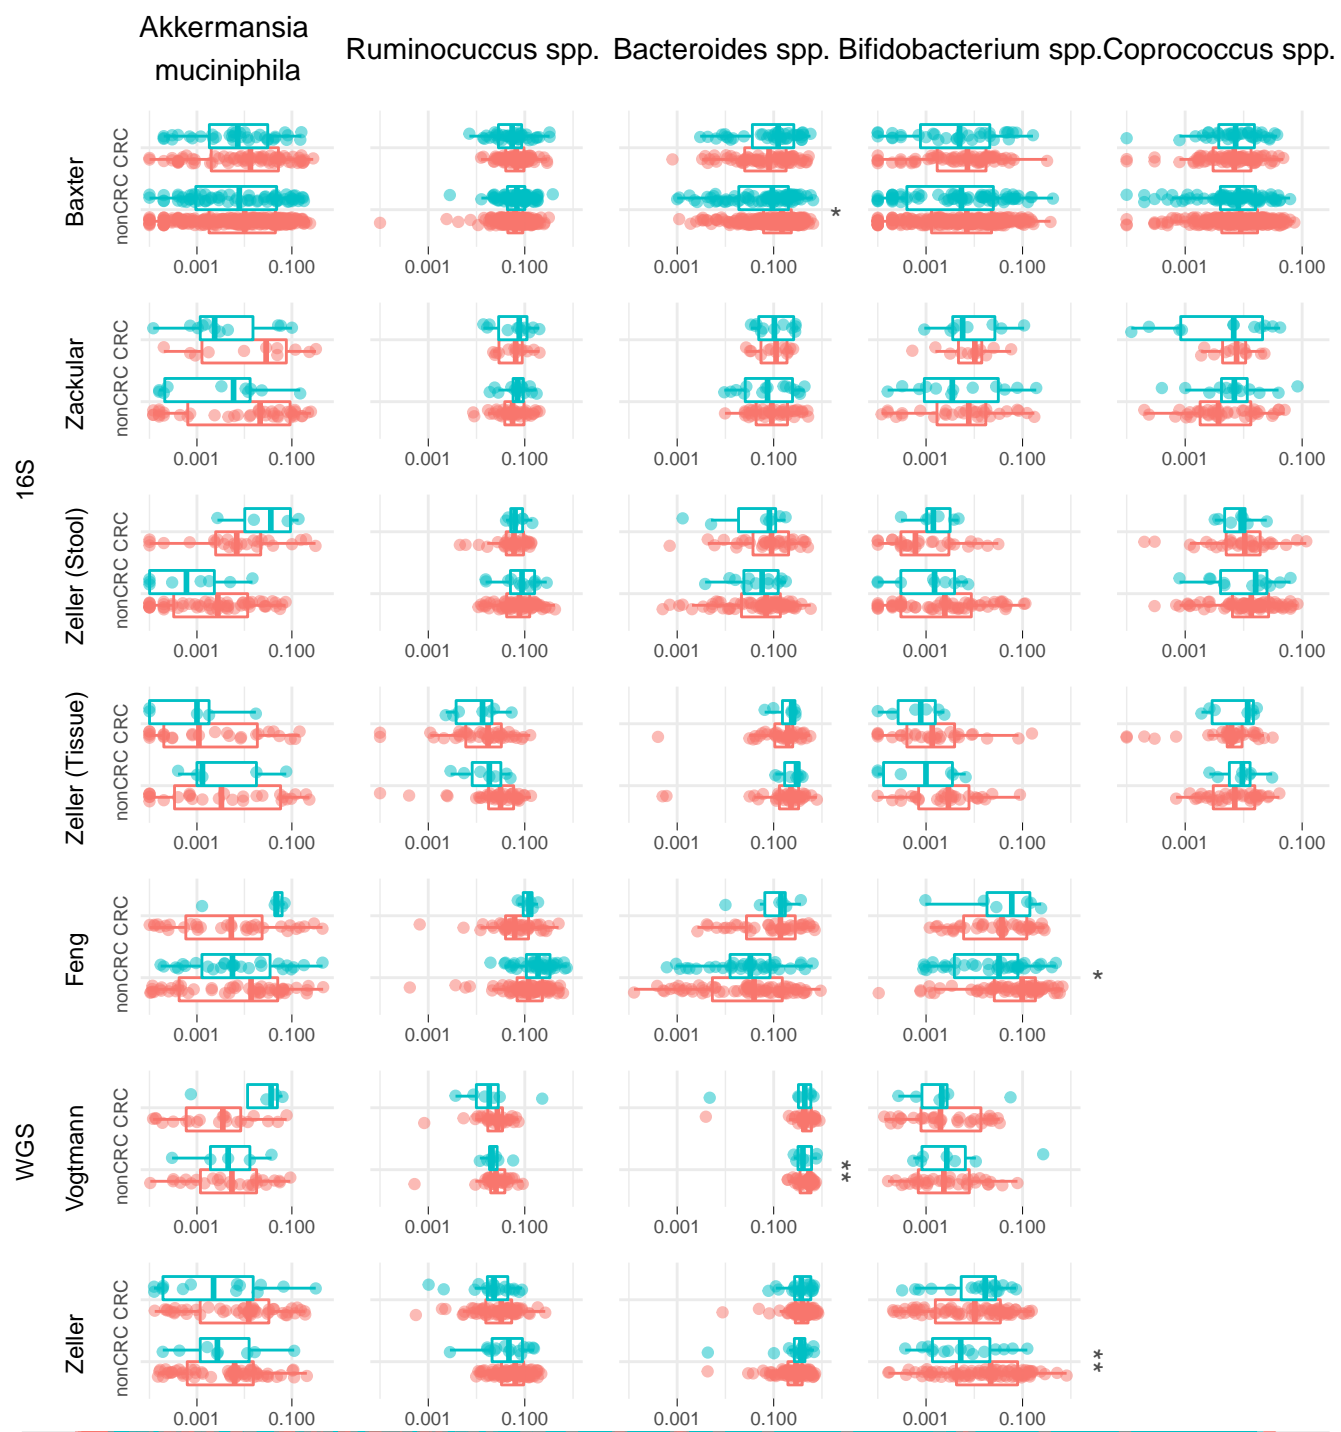

Fig. S4

Fig. S5

## Forest Plot

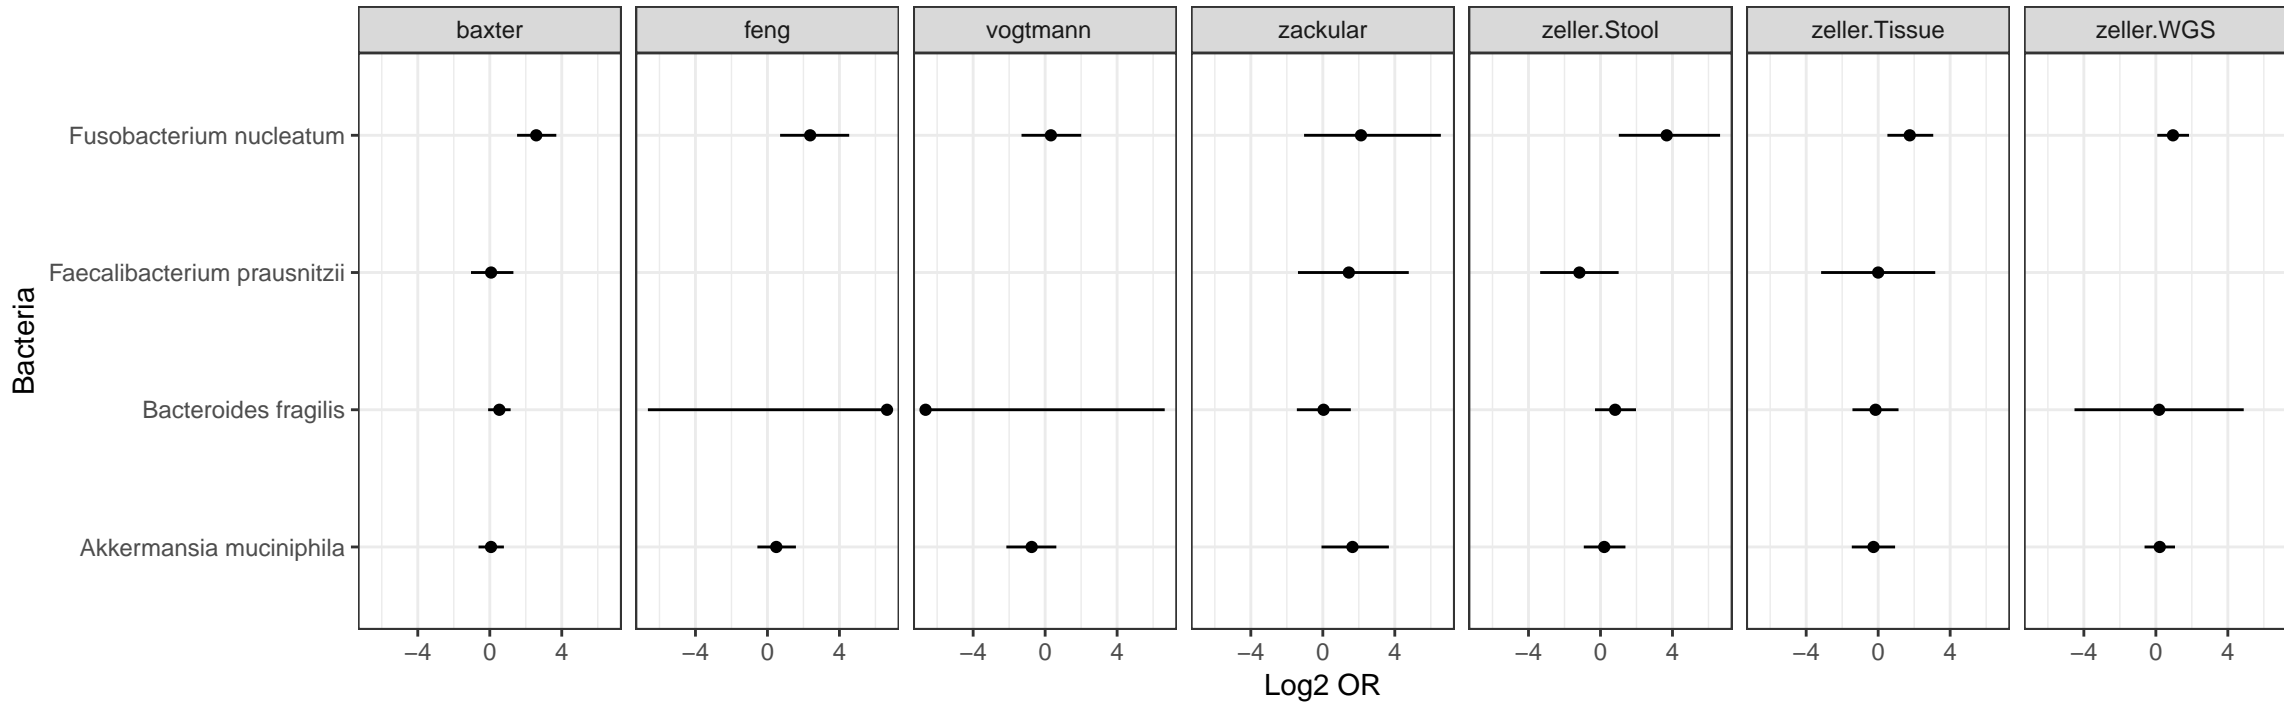



**Supplemental Table 2: Mediation analysis among taxa associated with obesity and CRC.**

| Study        | Taxa                                                                                                                                               | Change in          |           |         |          |           |
|--------------|----------------------------------------------------------------------------------------------------------------------------------------------------|--------------------|-----------|---------|----------|-----------|
|              |                                                                                                                                                    | Prob. <sup>a</sup> | Est       | p-value | LL (2.5) | UL (97.5) |
| baxter       | Bacteroides_fluxus                                                                                                                                 | -0.00865           | 0.00562   | 0.14969 | -0.00203 | 0.01328   |
| baxter       | Howardella_ureilytica                                                                                                                              | -0.00741           | 0.00067   | 0.60715 | -0.00188 | 0.00321   |
| baxter       |                                                                                                                                                    | -0.00722           |           |         |          |           |
|              | otu1526:Enterorhabdus_caecimuris:Enterorhabdus_mucosicola                                                                                          |                    | -1.00E-04 | 0.85142 | -0.00117 | 0.00097   |
| baxter       | otu2405:Allobaculum_stercoricanis                                                                                                                  | -0.00726           | 9.00E-05  | 0.87294 | -0.00106 | 0.00125   |
| baxter       | otu2695:Eubacterium_coprostanoligenes                                                                                                              | -0.00865           | 0.00562   | 0.30655 | -0.00515 | 0.01639   |
| baxter       | otu2753:Vallitalea_guaymasensis                                                                                                                    | -0.00785           | 0.00243   | 0.64083 | -0.00779 | 0.01266   |
| baxter       | otu847:Clostridium_aerotolerans:Clostridium_algidixylanolyticum:Clostridium_saccharolyticum:Clostridium_xylanolyticum:Gracilibacter_thermotolerans | -0.00798           | 0.00296   | 0.62175 | -0.00881 | 0.01474   |
| baxter       | otu911:Intestinimonas_butyriciproducens                                                                                                            | -0.008             | 0.00304   | 0.66624 | -0.01077 | 0.01685   |
| feng         | Haemophilus_parainfluenzae                                                                                                                         | 0.00763            | -5.00E-05 | 0.98819 | -0.00621 | 0.00612   |
| feng         | Lactobacillus_casei_group                                                                                                                          | 0.00753            | 0.00037   | 0.88939 | -0.00482 | 0.00556   |
| feng         | Prevotella_denticola                                                                                                                               | 0.00884            | -0.00487  | 0.7282  | -0.03235 | 0.0226    |
| feng         | Prevotella_ruminicola                                                                                                                              | 0.00878            | -0.00464  | 0.70382 | -0.02859 | 0.0193    |
| zackular     | Bacteroides_eggerthii                                                                                                                              | -0.01117           | -0.00027  | 0.99158 | -0.05084 | 0.0503    |
| zackular     | Bacteroides_nordii                                                                                                                                 | -0.01306           | 0.0073    | 0.50709 | -0.01427 | 0.02887   |
| zackular     | Bacteroides_salyersiae                                                                                                                             | -0.01058           | -0.00262  | 0.62977 | -0.01325 | 0.00802   |
| zackular     | Gemmiger_formicilis                                                                                                                                | -0.01153           | 0.00116   | 0.72148 | -0.0052  | 0.00751   |
| zackular     | otu1157:Alistipes_indistinctus                                                                                                                     | -0.01127           | 0.00014   | 0.98768 | -0.01788 | 0.01816   |
| zackular     | otu1202:Clostridium_botulinum:Clostridium_sporogenes                                                                                               | -0.01062           | -0.00248  | 0.69992 | -0.01512 | 0.01015   |
| zackular     | otu1257:Intestinimonas_butyriciproducens                                                                                                           | -0.01126           | 9.00E-05  | 0.98154 | -0.00782 | 0.00801   |
| zackular     | otu1316:Ruminococcus_flavefaciens                                                                                                                  | -0.01065           | -0.00236  | 0.74719 | -0.01668 | 0.01197   |
| zackular     | otu1989:Eubacterium_coprostanoligenes                                                                                                              | -0.01113           | -0.00041  | 0.90967 | -0.0075  | 0.00668   |
| zackular     | otu2005:Alistipes_finegoldii:Alistipes_massiliensis                                                                                                | -0.01097           | -0.00108  | 0.75814 | -0.00793 | 0.00578   |
| zackular     | otu327:Prevotella_oris                                                                                                                             | -0.01158           | 0.00136   | 0.77451 | -0.00794 | 0.01066   |
| zackular     | otu476:Clostridium_saccharogumia                                                                                                                   | -0.01117           | -0.00026  | 0.96635 | -0.01256 | 0.01203   |
| zackular     | otu508:Caloramator_fervidus:Trigonala_elaeagnus                                                                                                    | -0.01108           | -0.00064  | 0.94102 | -0.01763 | 0.01635   |
| zackular     | Phascolarctobacterium_succinatutens                                                                                                                | -0.01117           | -0.00025  | 0.92066 | -0.00523 | 0.00473   |
| zeller.Stool | Clostridium_bolteae:Clostridium_clostridioforme                                                                                                    | -0.00063           | 0.00049   | 0.87263 | -0.00547 | 0.00644   |
| zeller.Stool | Dialister_invisus                                                                                                                                  | -0.00037           | -0.00052  | 0.94127 | -0.01446 | 0.01341   |
| zeller.Stool | Dialister_succinatiphilus                                                                                                                          | -0.00081           | 0.00121   | 0.76375 | -0.0067  | 0.00912   |
| zeller.Stool | otu2321:Streptococcus_salivarius:Streptococcus_thermophilus:Streptococcus_vestibularis                                                             | 0.00046            | -0.00388  | 0.81746 | -0.03681 | 0.02906   |
| zeller.Stool | otu2483:Prevotella_copri                                                                                                                           | -9E-05             | -0.00167  | 0.80792 | -0.01516 | 0.01182   |
| zeller.Stool | otu4937:Peptococcus_niger                                                                                                                          | -0.00023           | -0.00108  | 0.76023 | -0.00805 | 0.00588   |
| zeller.Stool | otu834:Prevotella_copri:Prevotella_stercorea                                                                                                       | -0.00049           | -5.00E-05 | 0.97294 | -0.00321 | 0.0031    |
| zeller.Stool | Phascolarctobacterium_succinatutens                                                                                                                | -0.00054           | 0.00013   | 0.99755 | -0.08285 | 0.08311   |
| zeller.Stool | Streptococcus_porcinus:Streptococcus_seminale:Streptococcus_uberis                                                                                 | 0.00037            | -0.00352  | 0.62505 | -0.01762 | 0.01059   |
| zeller.Stool | Streptococcus_salivarius                                                                                                                           | 0.00138            | -0.00756  | 0.28432 | -0.02139 | 0.00628   |
| zeller.WGS   | Bifidobacterium_bifidum                                                                                                                            | -0.00557           | 0.00212   | 0.98433 | -0.2097  | 0.21395   |
| zeller.WGS   | Bifidobacterium_catenulatum                                                                                                                        | -0.00443           | -0.00244  | 0.37338 | -0.00783 | 0.00294   |
| zeller.WGS   | Streptococcus_salivarius                                                                                                                           | -0.00694           | 0.00761   | 0.41392 | -0.01065 | 0.02588   |
| zeller.WGS   | Bacteroides_sp._2_1_16                                                                                                                             | 0.05349            |           | 1.05494 |          |           |
| zeller.WGS   | Streptococcus_salivarius                                                                                                                           | 0.05349            | 0.0257    | 1.05494 | 1.02604  | -0.0289   |
| zeller.WGS   | [Eubacterium]_eligens                                                                                                                              | 0.05349            |           | 1.05494 |          |           |
| zeller.WGS   | Bifidobacterium_bifidum                                                                                                                            | 0.05349            | 0.0312    | 1.05494 | 1.03169  | -0.02325  |

<sup>a</sup> quantification of the change in OR from model 1 to model 2.



Supplemental Table 3: Mediation Cross Tabulation

| Study        | Bacteria                                   | CRC_Bact_Present | CRC_Bact_NotPresent | nonCRC_Bact_Present | nonCRC_Bact_NotPresent |
|--------------|--------------------------------------------|------------------|---------------------|---------------------|------------------------|
| baxter       | otu2695:Eubacterium_coprostanoligenes      | 102              | 54                  | 267                 | 63                     |
| baxter       | otu911:Intestinimonas_butyrificiproducens  | 209              | 87                  | 160                 | 30                     |
| baxter       | otu2405:Allobaculum_stercoricanis          | 91               | 32                  | 278                 | 85                     |
| baxter       | Howardella_ureilytica                      | 70               | 28                  | 299                 | 89                     |
| baxter       | otu1526                                    | 83               | 28                  | 286                 | 89                     |
| baxter       | otu2753:Vallitalea_guaymasensis            | 181              | 45                  | 188                 | 72                     |
| baxter       | otu847                                     | 237              | 60                  | 132                 | 57                     |
| baxter       | Bacteroides_fluxus                         | 65               | 3                   | 304                 | 114                    |
| zackular     | otu508:Caloramator_fervidus                | 32               | 13                  | 26                  | 11                     |
| zackular     | Gemmiger_formicilis                        | 52               | 20                  | 6                   | 4                      |
| zackular     | otu1989:Eubacterium_coprostanoligenes      | 21               | 9                   | 37                  | 15                     |
| zackular     | otu2005                                    | 9                | 4                   | 49                  | 20                     |
| zackular     | Phascolarctobacterium_succinatutens        | 16               | 6                   | 42                  | 18                     |
| zackular     | otu1257:Intestinimonas_butyrificiproducens | 30               | 13                  | 28                  | 11                     |
| zackular     | Bacteroides_salyersiae                     | 6                | 2                   | 52                  | 22                     |
| zackular     | otu476:Clostridium_saccharogumia           | 44               | 17                  | 14                  | 7                      |
| zackular     | Bacteroides_eggerthii                      | 25               | 5                   | 33                  | 19                     |
| zackular     | otu1157:Alistipes_indistinctus             | 25               | 9                   | 33                  | 15                     |
| zackular     | otu1202                                    | 10               | 4                   | 48                  | 20                     |
| zackular     | Bacteroides_nordii                         | 24               | 6                   | 34                  | 18                     |
| zackular     | otu327:Prevotella_oris                     | 15               | 8                   | 43                  | 16                     |
| zackular     | otu1316:Ruminococcus_flavifaciens          | 13               | 8                   | 45                  | 16                     |
| zeller.Stool | Phascolarctobacterium_succinatutens        | 42               | 21                  | 44                  | 20                     |
| zeller.Stool | otu4937:Peptococcus_niger                  | 18               | 11                  | 68                  | 30                     |
| zeller.Stool | otu2483:Prevotella_copri                   | 29               | 13                  | 57                  | 28                     |
| zeller.Stool | otu834                                     | 15               | 6                   | 71                  | 35                     |
| zeller.Stool | Dialister_invisus                          | 29               | 10                  | 57                  | 31                     |
| zeller.Stool | Streptococcus_salivarius                   | 9                | 1                   | 77                  | 40                     |
| zeller.Stool | Streptococcus_porcinus                     | 6                | 2                   | 80                  | 39                     |
| zeller.Stool | Dialister_succinatiphilus                  | 20               | 8                   | 66                  | 33                     |
| zeller.Stool | Clostridium_bolteae                        | 53               | 26                  | 33                  | 15                     |
| zeller.Stool | otu2321                                    | 58               | 21                  | 28                  | 20                     |
| feng         | Ruminococcus sp. 5_1_39BFAA                | 110              | 46                  |                     |                        |
| feng         | Prevotella_denticola                       | 73               | 40                  | 37                  | 6                      |
| feng         | Lactobacillus_casei group                  | 81               | 36                  | 29                  | 10                     |
| feng         | Haemophilus_parainfluenzae                 | 84               | 36                  | 26                  | 10                     |
| feng         | Prevotella_ruminicola                      | 72               | 39                  | 38                  | 7                      |
| feng         | Coprobacillus sp. D7                       | 110              | 46                  |                     |                        |
| zeller.WGS   | Bifidobacterium_catulatum                  | 103              | 88                  | 2                   | 1                      |
| zeller.WGS   | Bacteroides sp. 2_1_16                     | 105              | 89                  |                     |                        |
| zeller.WGS   | Streptococcus_salivarius                   | 105              | 88                  |                     |                        |
| zeller.WGS   | [Eubacterium] eligens                      | 105              | 89                  |                     |                        |
| zeller.WGS   | Bifidobacterium_bifidum                    | 105              | 88                  |                     |                        |

ium\_aerotolerans:Clostridium\_algidixylanolyticum:Clostridium\_saccharolyticum:Clostridium\_s thermophilus:Streptococcus\_vestibularis otu508:Caloramator\_fervidus:Trigonala\_elaegnis Clostridium\_bolteae:Clostridium\_clostridioforme Streptococcus\_porcinus:Streptococcus\_seminale:Streptococcus\_uberis lla\_copri:Prevotella\_stercorea

**Supplemental Table 4. Taxa with Q values <0.2 after performing mediation analysis between PooledDS and PooledBMI**

| <b>Baxter</b>            | <b>Zackular</b>                        | <b>Zeller (16S)</b>                    | <b>Feng</b>                 | <b>Zeller (WGS)</b>         | <b>Vogtmann</b> |
|--------------------------|----------------------------------------|----------------------------------------|-----------------------------|-----------------------------|-----------------|
| OTUotu2695               | OTUotu508                              | OTUPhascolarctobacterium_succinatutens | Ruminococcus sp. 5_1_39BFAA | Bifidobacterium catenulatum | None            |
| OTUotu911                | OTUGemmiger_formicilis                 | OTUotu4937                             | Prevotella denticola        | Bacteroides sp. 2_1_16      |                 |
| OTUotu2405               | OTUotu1989                             | OTUotu2483                             | Lactobacillus casei group   | Streptococcus salivarius    |                 |
| OTUHowardella_ureilytica | OTUotu2005                             | OTUotu834                              | Haemophilus parainfluenzae  | [Eubacterium] eligens       |                 |
| OTUotu1526               | OTUPhascolarctobacterium_succinatutens | OTUDialister_invisus                   | Prevotella ruminicola       | Bifidobacterium bifidum     |                 |
| OTUotu2753               | OTUotu1257                             | OTUStreptococcus_salivarius            | Coprobacillus sp. D7        |                             |                 |
| OTUotu847                | OTUBacteroides_salyersiae              | OTUStreptococcus_porcinus              |                             |                             |                 |
| OTUBacteroides_fluxus    | OTUotu476                              | OTUDialister_succinatiphilus           |                             |                             |                 |
|                          | OTUBacteroides_eggerthii               | OTUClostridium_bolteae                 |                             |                             |                 |
|                          | OTUotu1157                             | OTUotu2321                             |                             |                             |                 |
|                          | OTUotu1202                             |                                        |                             |                             |                 |
|                          | OTUBacteroides_nordii                  |                                        |                             |                             |                 |
|                          | OTUotu327                              |                                        |                             |                             |                 |
|                          | OTUotu1316                             |                                        |                             |                             |                 |
